# Supplementary material for: A scalable method for preparing Cu electrocatalysts that convert CO2 into C2+ products
Source: PubMed Central journal article supplement (PMC7368024; doi:10.1038/s41467-020-16998-9), 2020-07-17
Supplement: 41467_2020_16998_MOESM1_ESM.pdf [file 41467_2020_16998_MOESM1_ESM.pdf]

# Supplementary Information

## **A Scalable Method for Preparing Cu Electrocatalysts that Convert CO<sub>2</sub> into C<sub>2+</sub> Products**

Taehee Kim<sup>1,2</sup> & G. Tayhas R. Palmore<sup>1</sup>

<sup>1</sup> School of Engineering, Brown University, Providence, RI 02912, United States

<sup>2</sup> Photo-electronic Hybrids Research Center, Korea Institute of Science and Technology (KIST), Seoul 02792, Republic of Korea

Correspondence and requests for materials should be addressed to G. T. R. P.

(email: [Tayhas\\_Palmore@brown.edu](mailto:Tayhas_Palmore@brown.edu))

Supplementary Information include 20 Supplementary Figures, 8 Supplementary Table, 6 Supplementary Notes, and Supplementary References

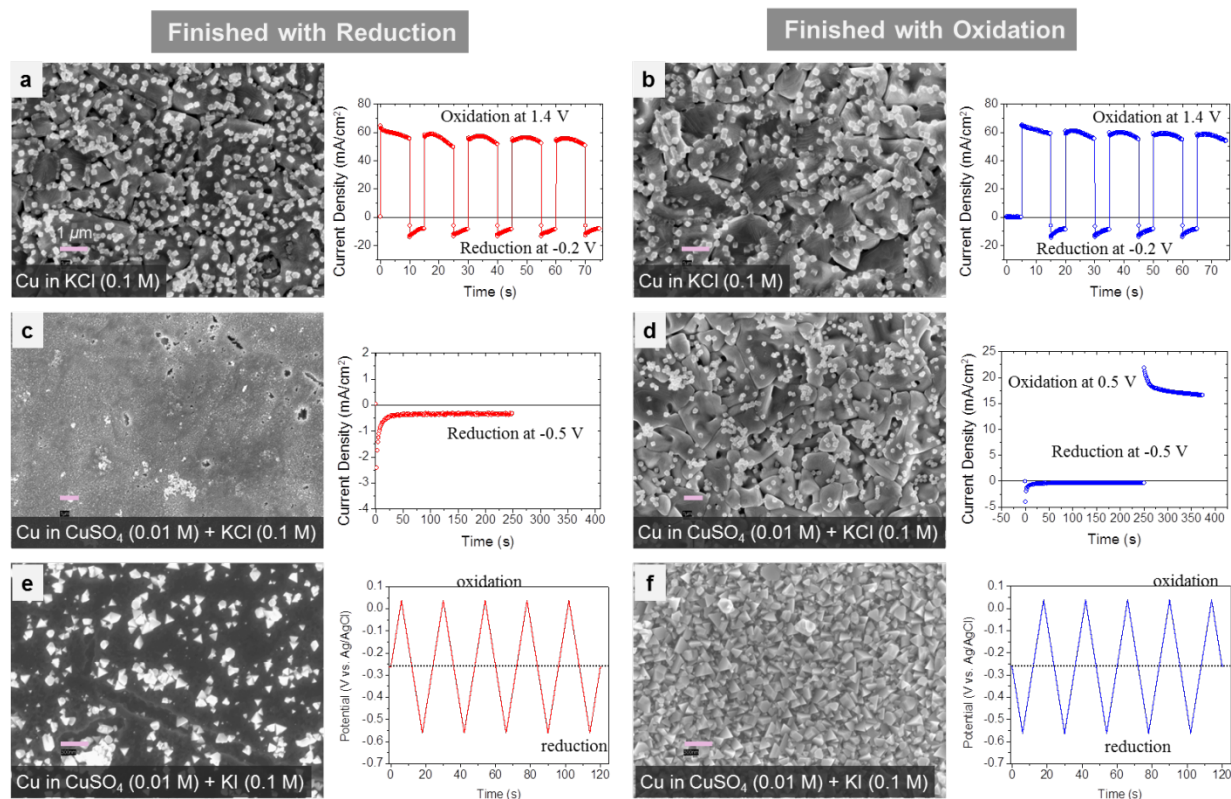

**Supplementary Figure 1.** Comparison of morphology of Cu foils subjected to electrochemical cycling reported by others and stopped at either reductive (left) or oxidative potential (right). SEM image of a Cu foil cycled between 1.4 V and -0.2 V in 0.1 M KCl and ending at (a) a reductive potential or (b) an oxidative potential and their corresponding current density vs. time plots. For each cycle, the potential was held at positive and negative potentials for 10 and 5 s, respectively.<sup>1</sup> (c) SEM image of a Cu foil after electrodeposition in 0.01 M  $\text{Cu}_2\text{SO}_4$  + 0.1 M KCl at -0.5 V for 250 s and corresponding current density vs. time plot. (d) SEM image of a Cu foil after one cycle in 0.01 M  $\text{Cu}_2\text{SO}_4$  + 0.1 M KCl where potential was held at -0.5 V for 250 s and subsequently held at 0.5 V for 125 s and corresponding current density vs. time plot. (e) SEM image of a Cu foil cycled between  $V_P$  and  $V_N$  in 0.01 M  $\text{Cu}_2\text{SO}_4$  + 0.1 M KI at 50 mV/s where  $V_P = V_{OC} + 0.3$  V and  $V_N = V_{OC} - 0.3$  V and  $V_{OC} = -0.262$  V, ending with a reductive cycle and corresponding applied potential vs. time plot. (f) SEM image of a Cu foil cycled between  $V_P$  and  $V_N$  in 0.01 M  $\text{Cu}_2\text{SO}_4$  + 0.1 M KI at 50 mV/s, ending with an oxidative cycle and corresponding applied potential vs. time plot. All plots reflect geometric current density, potentials referenced to Ag/AgCl, and scale bars = 1 micron. Comparing data reveals similar morphologies (mesostructures of CuCl and small cubes of  $\text{Cu}_2\text{O}$ ) in (a) and (b); formation of small cubic structures and mesostructures only at an oxidative potential (d) not (c); preservation of CuI structures when potential cycling ends at an oxidative potential (f) not (e). Source data are provided as a Source Data file.

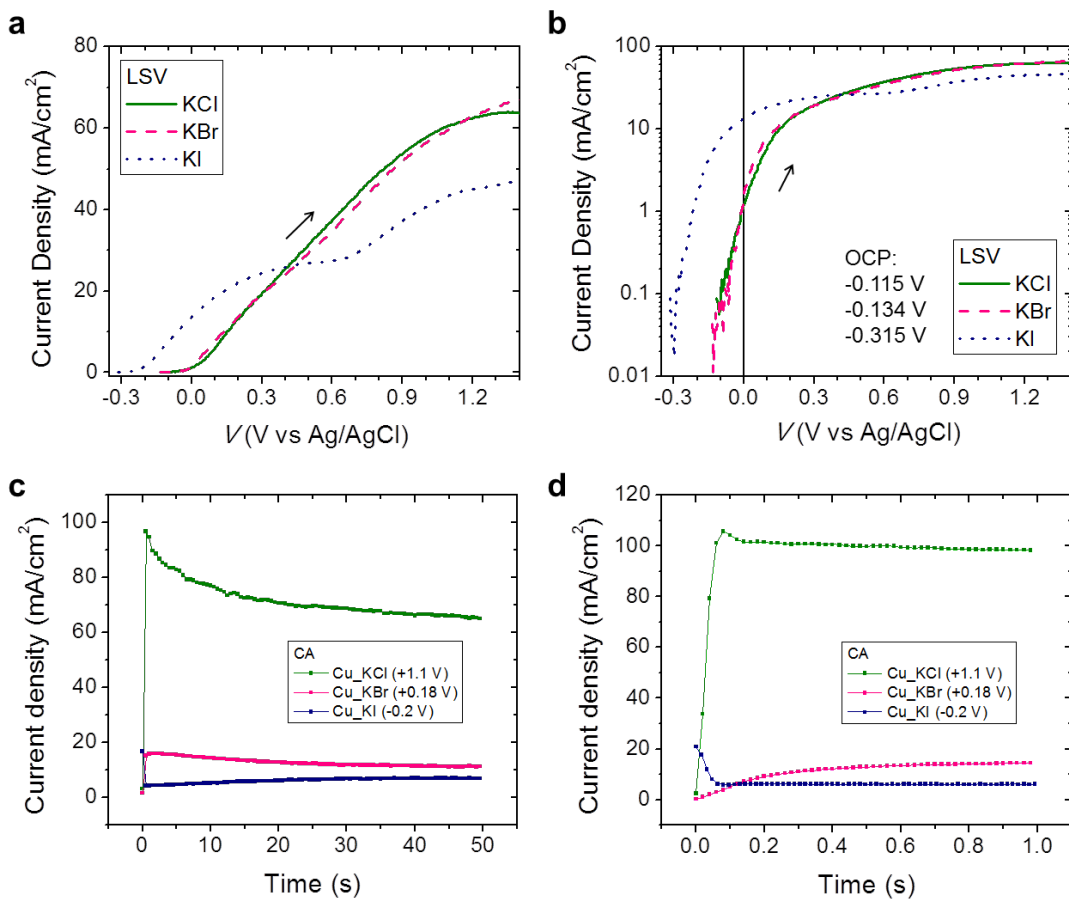

**Supplementary Figure 2.** Anodic halogenation of Cu foils. Linear sweep voltammograms of electropolished Cu foils in 0.1 M KCl, KBr, or KI electrolyte (a). Data in (a) replotted on a logarithm scale (b). Chronoamperograms of anodic halogenation of Cu foils for 50 s (c). Data shown in (c) zoomed in to highlight initial stage of procedure (d). The arrows in (a) and (b) indicate the sweep direction. All current densities correspond to geometric current density. Source data are provided as a Source Data file.

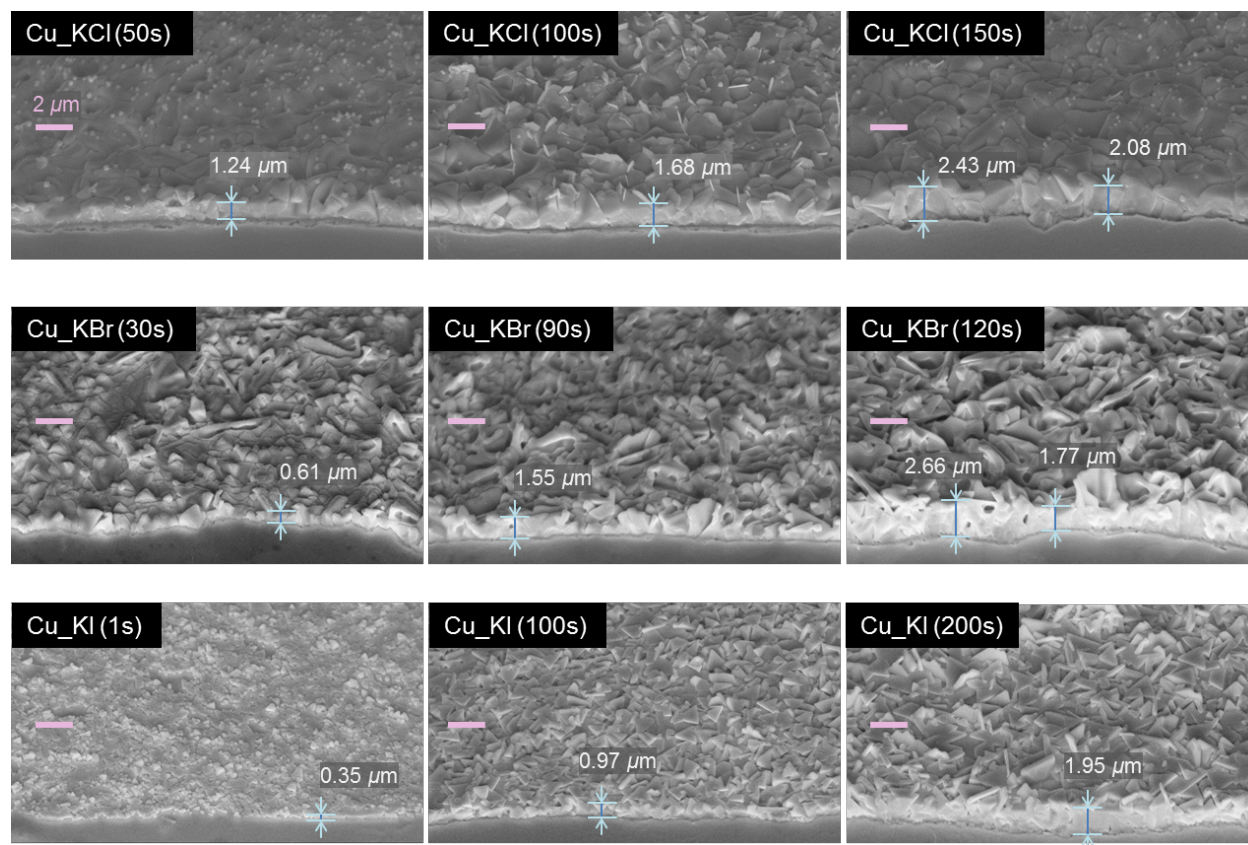

**Supplementary Figure 3.** Cross-sectional SEM images of Cu\_KCl, Cu\_KBr, and Cu\_KI samples prepared by anodic halogenation for different amounts of time. Images were taken at a tilt angle of 45° and all scale bars correspond to 2 microns. These images reveal that increasing the anodic halogenation time results in an increase in the thickness of CuX.

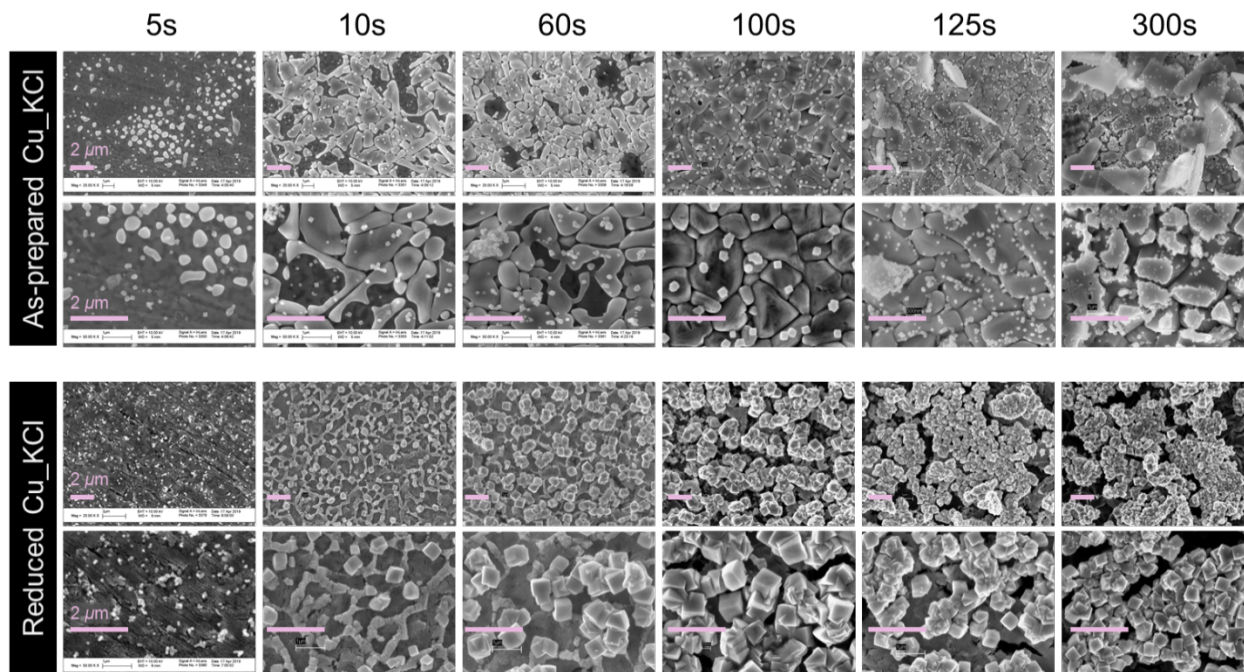

**Supplementary Figure 4.** Plan-view SEM images of Cu\_KCl prepared by anodic halogenation for different amounts of time. Scale bars correspond to 2 microns. Samples were subsequently reduced (LSV) from the OCP to -1.8 V vs. Ag/AgCl in CO<sub>2</sub>-saturated 0.1 M KHCO<sub>3</sub>. These images reveal that anodic chlorination for less than 60s does not produce a high density of defects on all areas of exposed Cu foils.

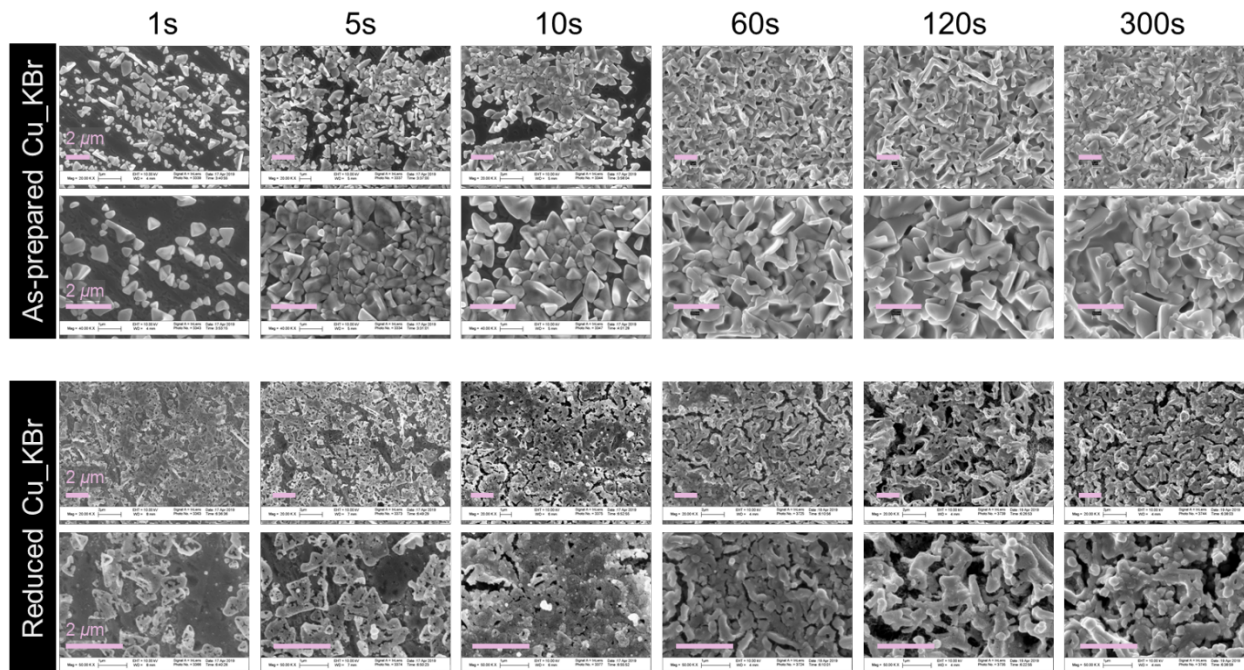

**Supplementary Figure 5.** Plan-view SEM images of the brominated Cu prepared by anodic halogenation for different amounts of time. Scale bars correspond to 2 microns. Samples of Cu\_KBr were subsequently reduced (LSV) from the OCP to -1.8 V vs. Ag/AgCl in CO<sub>2</sub>-saturated 0.1 M KHCO<sub>3</sub>. These images reveal that at least 60s of anodic halogenation is required to cover the Cu foil completely with CuBr.

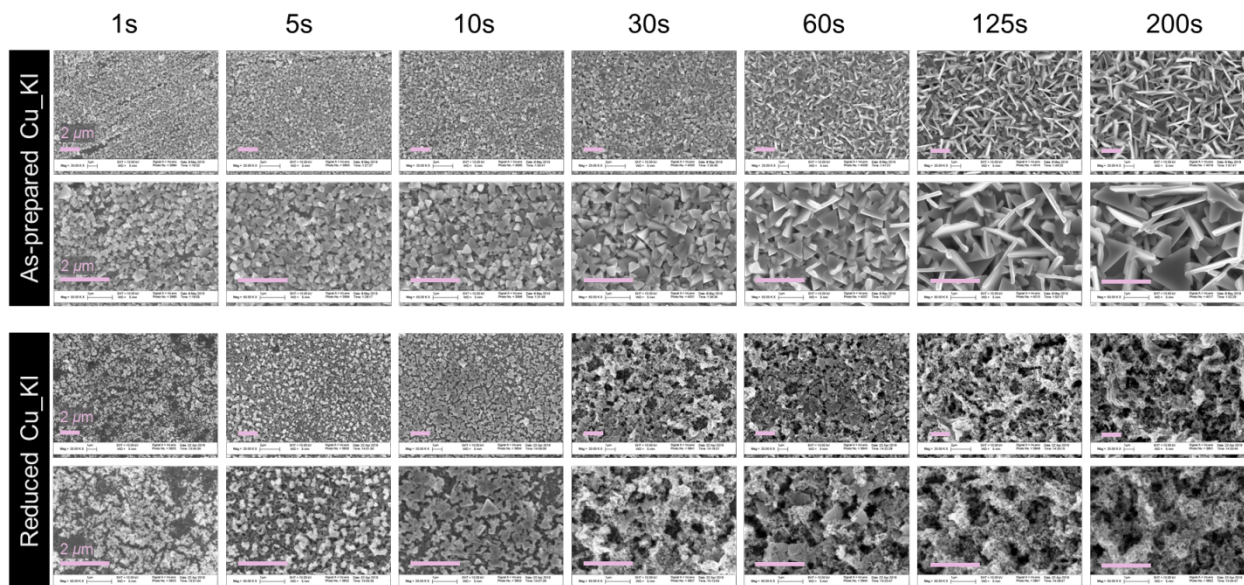

**Supplementary Figure 6.** Plan-view SEM images of the iodinated Cu prepared by anodic halogenation for different amounts of time. Scale bars correspond to 2 microns. Samples of Cu\_KI were subsequently reduced (LSV) from the OCP to -1.8 V vs. Ag/AgCl in CO<sub>2</sub>-saturated 0.1 M KHCO<sub>3</sub>. These images reveal that 10 s of anodic iodination completely covers the underlying Cu foil with CuI and longer times of anodic iodination (i.e., 200 s) makes the surface too rough.

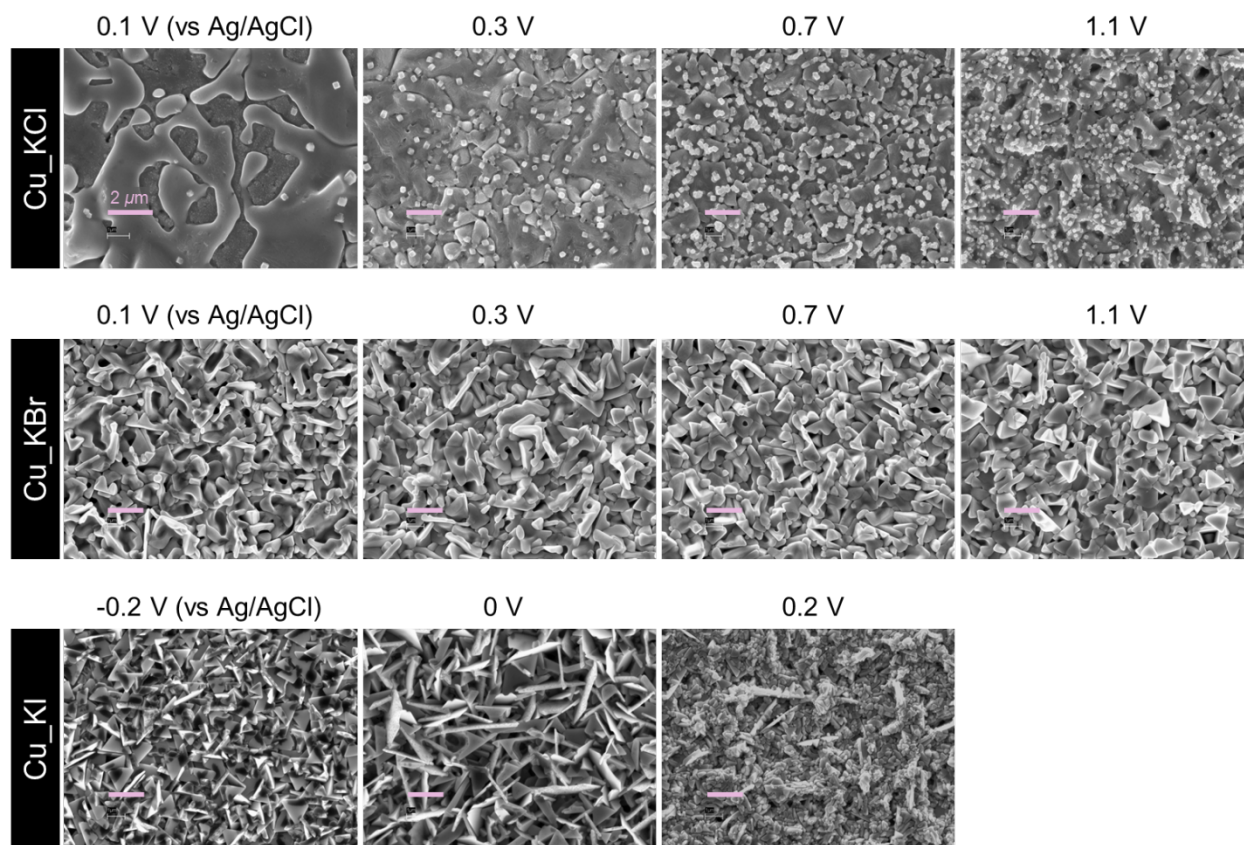

**Supplementary Figure 7.** Plan-view SEM images of chlorinated Cu (Cu\_KCl), brominated Cu (Cu\_KBr), and iodinated Cu (Cu\_KI) after anodic halogenation for 125 s at different applied potentials. Scale bars correspond to 2 microns.



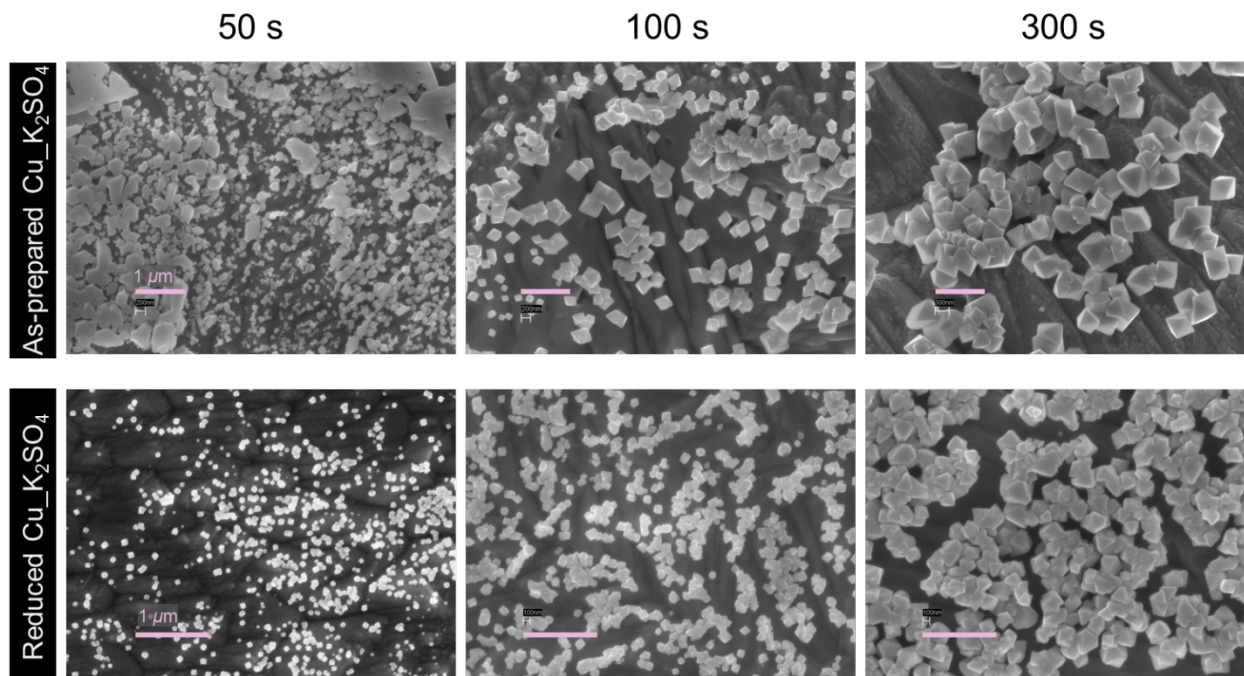

**Supplementary Figure 8.** Plan-view SEM images of electropolished Cu foil anodically oxidized in 0.05 M K<sub>2</sub>SO<sub>4</sub> for different amounts of time and subsequently reduced by LSV from the OCP to -1.8 V vs. Ag/AgCl in CO<sub>2</sub>-saturated 0.1 M KHCO<sub>3</sub>. Scale bars correspond to 1 micron. Compared to the SEM images of Cu\_KX samples, these images reveal that anodic oxidation of electropolished Cu foil in the absence of halogen ions does not result in complete coverage of the underlying substrate with an oxide layer even after 300 s of oxidation. Moreover, octahedral crystals with (111) facets develop on the surface of the Cu foil. Consequently, electrochemical CO<sub>2</sub> RR at these electrodes yields products (i.e., C<sub>1</sub> products) expected from polycrystalline Cu and Cu(111) in particular.

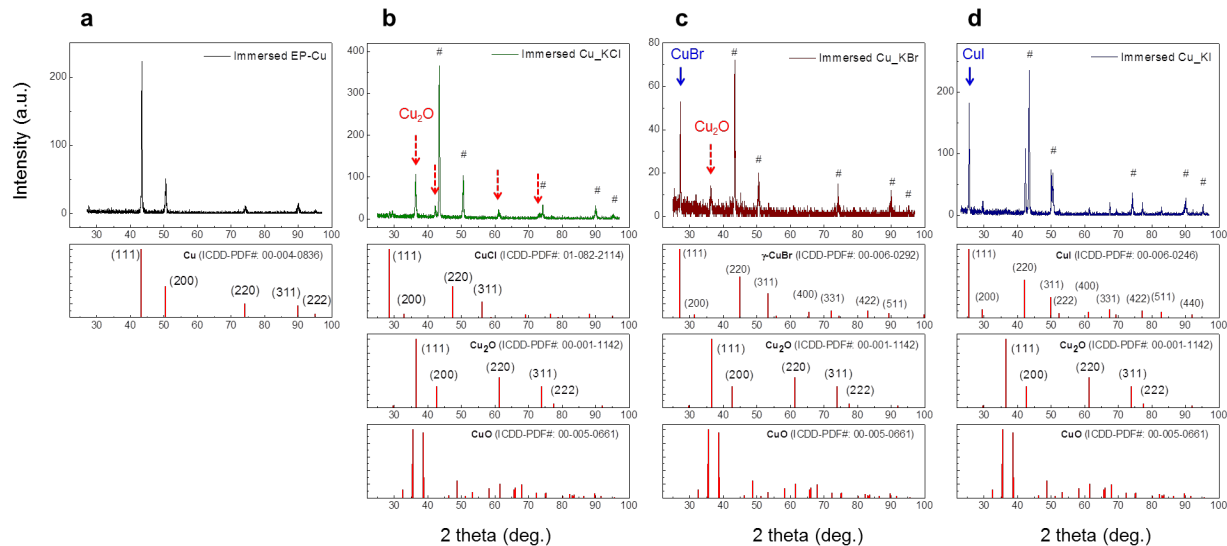

**Supplementary Figure 9.** GI-XRD data of the electropolished Cu foil (a), Cu\_KCl (b), Cu\_KBr (c), and Cu\_KI (d) after immersion in air-saturated 0.1 M KHCO<sub>3</sub> for 10 min. Peaks corresponding to CuO were not observed in any of the XRD measurements. Red dashed arrows identify peaks corresponding to Cu<sub>2</sub>O and # identify peaks corresponding to the underlying Cu foil substrate. (a) Peaks corresponding to Cu<sub>2</sub>O are not observed. A thin layer or small domains of Cu<sub>2</sub>O on the surface of electropolished Cu foil (as indicated by EDS) may not be enough material to produce an observable XRD peak. (b) Peaks corresponding to Cu<sub>2</sub>O are observed and the peak corresponding to CuCl (2theta = 28.5°) decreased significantly. This result indicates that most of the CuCl is converted into Cu<sub>2</sub>O when Cu\_KCl is immersed in air-saturated KHCO<sub>3</sub>. (c) Peaks corresponding to CuBr (2theta = 27.1°) and Cu<sub>2</sub>O (2theta = 36.6°) are observed. This result indicates that CuBr is converted into Cu<sub>2</sub>O only partially when Cu\_KBr is immersed in air-saturated KHCO<sub>3</sub>. (d) Peaks corresponding to Cu<sub>2</sub>O were not observed. If defect sites on the surface and subsurface of Cu\_KI forms Cu<sub>2</sub>O by immersion in air-saturated KHCO<sub>3</sub>, its crystalline domains were not large enough to produce peaks corresponding Cu<sub>2</sub>O. Source data are provided as a Source Data file.

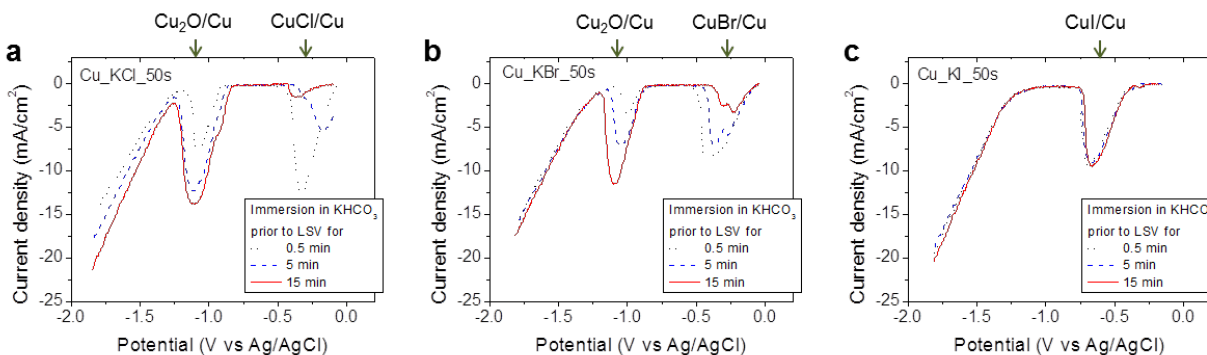

**Supplementary Figure 10.** Linear sweep voltammetry (LSV) data of Cu\_KCl (a), Cu\_KBr (b), and Cu\_KI (c) after different amounts of time immersed in air-saturated 0.1 M  $\text{KHCO}_3$ . All samples were anodically halogenated for 50 s and subsequently immersed in 0.1 M  $\text{KHCO}_3$  for 0.5 min, 5 min, or 15 min. Afterwards, the samples were reduced by LSV from the OCP to -1.8 V at a scan rate of 5 mV/s. The peak at -1.1 V vs. Ag/AgCl in the LSV data corresponds to the reduction of  $\text{Cu}_2\text{O}$ :  $\text{Cu}_2\text{O} (\text{s}) + 2\text{e}^- (\text{aq}) + \text{H}^+ (\text{aq}) \rightarrow 2\text{Cu} (\text{s}) + \text{OH}^- (\text{aq})$ . The peaks at less negative potentials between -0.3 to -0.6 V vs. Ag/AgCl correspond to the reduction of  $\text{CuX}$ :  $\text{CuX} (\text{s}) + \text{e}^- \rightarrow \text{Cu} (\text{s}) + \text{X}^- (\text{aq})$ . The LSV corresponding to Cu\_KCl immersed in  $\text{KHCO}_3$  for 15 min shows a significantly smaller peak at -0.3 V vs. Ag/AgCl and a larger peak at -1.1 V vs. Ag/AgCl compared to samples immersed for shorter times. This result provides evidence that CuCl was converted rapidly to  $\text{Cu}_2\text{O}$  upon immersion in air-saturated  $\text{KHCO}_3$ . The LSV curves corresponding to Cu\_KI show almost no change regardless of time immersed in air-saturated  $\text{KHCO}_3$ , confirming the relative stability of CuI to basic conditions. All current densities correspond to geometric current density. Source data are provided as a Source Data file.

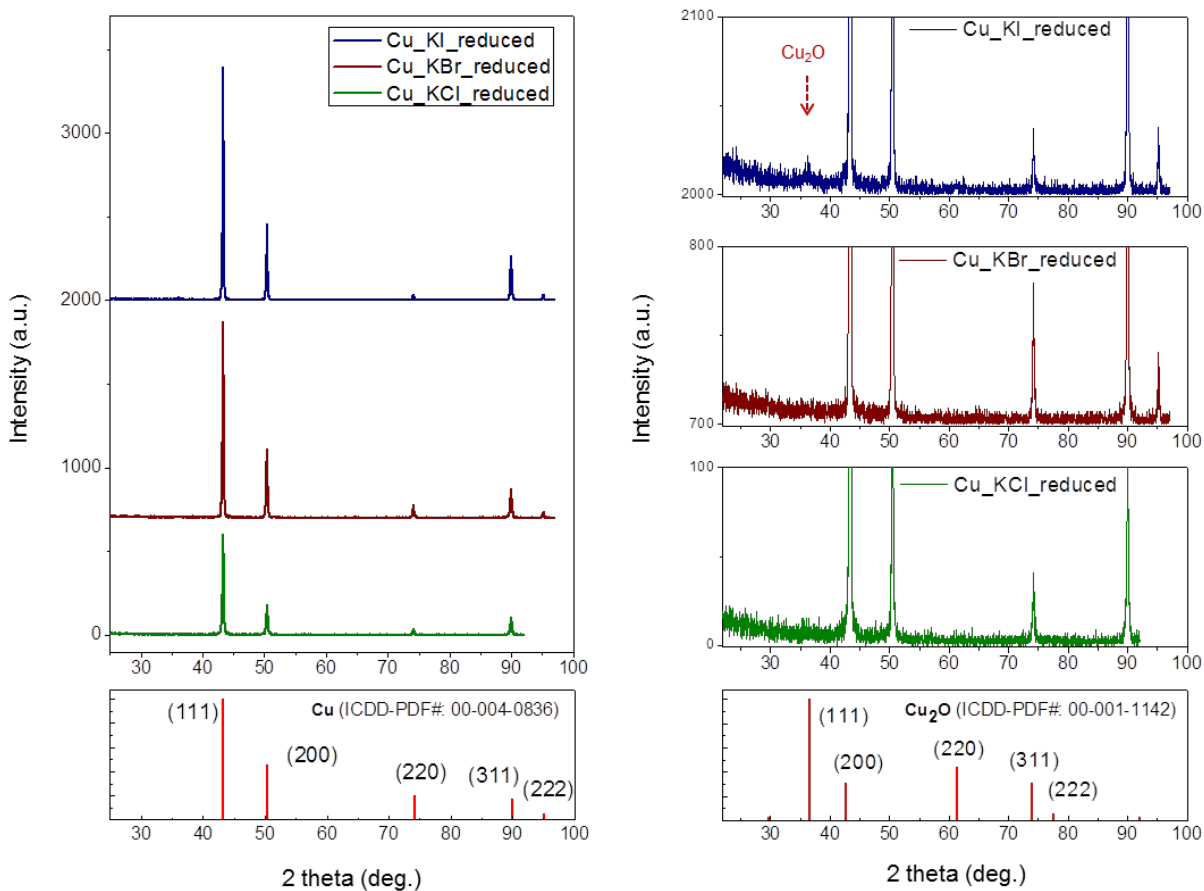

**Supplementary Figure 11.** GI-XRD data of the Cu\_KX samples after immersion in air-saturated  $\text{KHCO}_3$  and subsequent reduction in  $\text{CO}_2$ -saturated 0.1 M  $\text{KHCO}_3$  by LSV from its OCP to -1.8 V at a scan rate of 5 mV/s (left) and the same data magnified (right) to reveal the small peak corresponding to  $\text{Cu}_2\text{O}$ . These GI-XRD data of reduced catalysts (left) are nearly identical to that of the original electropolished Cu shown in Fig. 1a. In the data corresponding to reduced Cu\_KI, the peak from  $\text{Cu}_2\text{O}$  (111) appears at  $2\theta = 36.6^\circ$ . This result is consistent with the EDS data (see Fig. 3d and h), which show reduced Cu\_KI has a higher content of O relative to Cu\_KCl and Cu\_KBr. Source data are provided as a Source Data file.

**Supplementary Table 1.** EDS results of atomic composition and molecular composition of catalysts shown in Fig 4. Results are average values based on three measurements at different locations on the catalyst.

| Atomic composition               | Electropolished Cu |                   | Cu_KCl |                   |       | Cu_KBr |                   |       | Cu_KI |                   |       |
|----------------------------------|--------------------|-------------------|--------|-------------------|-------|--------|-------------------|-------|-------|-------------------|-------|
|                                  | Cu                 | O                 | Cu     | O                 | Cl    | Cu     | O                 | Br    | Cu    | O                 | I     |
| As-prepared                      | 98.36              | 1.64              | 59.37  | 2.31              | 38.32 | 59.58  | 2.37              | 38.06 | 48.70 | 16.06             | 35.20 |
| Immersed                         | 97.22              | 2.78              | 71.57  | 22.57             | 5.87  | 65.55  | 25.47             | 8.98  | 49.97 | 17.69             | 32.18 |
| Reduced                          | 98.37              | 1.63              | 92.56  | 7.44              | 0.00  | 91.70  | 8.02              | 0.27  | 84.35 | 15.56             | 0.08  |
| Composition of molecular species | Electropolished Cu |                   | Cu_KCl |                   |       | Cu_KBr |                   |       | Cu_KI |                   |       |
|                                  | Cu                 | Cu <sub>2</sub> O | Cu     | Cu <sub>2</sub> O | CuCl  | Cu     | Cu <sub>2</sub> O | CuBr  | Cu    | Cu <sub>2</sub> O | CuI   |
| As-prepared                      | 98.30              | 1.70              | 28.80  | 4.04              | 67.15 | 29.32  | 4.13              | 66.55 | 0.00  | 16.10             | 83.90 |
| Immersed                         | 97.06              | 2.94              | 41.77  | 46.21             | 12.02 | 13.90  | 63.68             | 22.42 | 0.00  | 21.66             | 78.34 |
| Reduced                          | 98.32              | 1.68              | 91.25  | 8.75              | 0.00  | 90.09  | 9.59              | 0.33  | 77.20 | 22.68             | 0.12  |

**Supplementary Table 2.** Conversion of EDS data from atomic composition into molecular composition.

| Molecular species | Molecular composition | Atom  | Amount of atoms      | Normalized atomic Composition | Raw Data |
|-------------------|-----------------------|-------|----------------------|-------------------------------|----------|
| Cu                | (1-x-y)               | Cu    | $(1-x-y)+2x+y = 1+x$ | $1+x / (1+2x+y)$              | 0.5937   |
| Cu <sub>2</sub> O | x                     | O     | x                    | $x / (1+2x+y)$                | 0.02307  |
| CuCl              | y                     | Cl    | y                    | $y / (1+2x+y)$                | 0.3832   |
| Total             | 1                     | Total | 1+2x+y               | 1                             | 1        |

**Supplementary Note 1.** Conversion of EDS data from atomic composition into molecular composition.

For example, in the case of the as-prepared chlorinated Cu (Cu\_KCl), in order to convert the atomic composition into the molecular composition, three species are assumed to be present: Cu, Cu<sub>2</sub>O, and CuCl. Let x and y represent the molecular composition of Cu<sub>2</sub>O and CuCl, respectively. Since the total molecular composition should be 100%, the molecular composition of metallic Cu is then 1-x-y. From the assumed molecular composition, the relative number of atoms can be expressed: atomic Cu comes from metallic Cu (1-x-y), Cu<sub>2</sub>O (2x), and CuCl (y). When considering stoichiometry, Cu<sub>2</sub>O has two atoms of Cu (2x). Normalizing the atomic composition and solving the simultaneous equations gives the molecular composition:  $x/(1+2x+y) = 0.02307$  and  $y/(1+2x+y) = 0.3832$ . Then  $x = 0.0404$ ,  $y = 0.6715$ ,  $(1-x-y) = 0.288$ .

## Supplementary Note 2. Characterization of residual halide with XPS and EDS

Both X-ray photoelectron spectroscopy (XPS) and EDS were used to analyze the catalysts for residual halide after anodic halogenation and subsequent reduction (Supplementary Figures 12 and 13, respectively). Both techniques are used to profile the surface and subsurface of the catalysts to depths up to 10 nm (XPS) or a few microns (EDS).<sup>2,3</sup>

XPS data shown in Supplementary Figure 12 reveals the presence of cuprous halide peaks on the as-prepared Cu\_KX samples (at binding energy = 199 eV for Cl 2p<sub>3/2</sub>, 68.7 eV for Br 3d<sub>5/2</sub>, 619 eV for I 3d<sub>5/2</sub>). In contrast, halide peaks are not observed on any of the Cu\_KX samples when reduced by LSV from OCP to -1.8 V vs. Ag/AgCl at a scan rate of 5 mV/s.

Similarly, EDS data of Cu\_KX samples before and after electroreduction by LSV are shown in Supplementary Figure 13. Only reduced Cu\_KI samples (Supplementary Figure 13c) have residual iodide (0.06 atomic% and 0.135 atomic% at 30s and 60s of iodination time), consistent with results shown in Fig. 3 and Supplementary Table 1 (0.08 atomic% at 50s of iodination time). Thus, both XPS and EDS provide strong evidence that only a trace amount of halide remains, and only on the Cu\_KI catalyst (up to 0.625 atomic% at 250 s of iodination time). This amount of halide is unlikely to affect electrochemical CO<sub>2</sub> RR based on the following calculation: assume the catalyst has a geometric area of 0.35 cm<sup>2</sup> and a CuI-derived thickness of 2 microns. If all residual iodide ions are released into the electrolyte (8 mL) during electrochemical CO<sub>2</sub> RR, the maximum concentration of iodide is only 7.7\*10<sup>-6</sup> M.

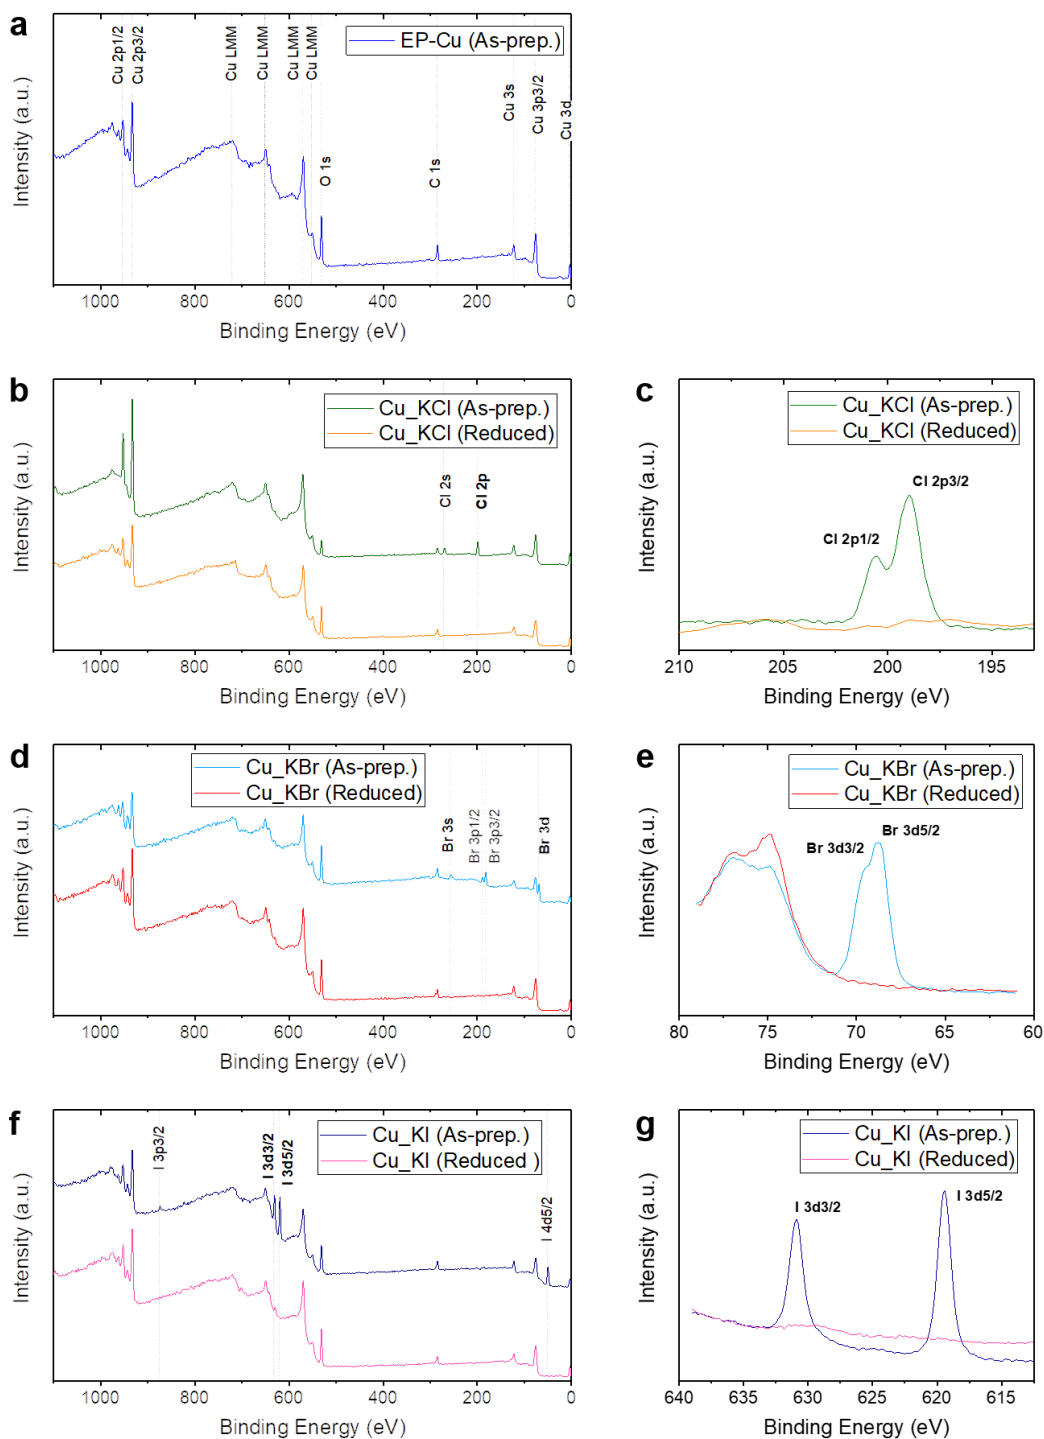

**Supplementary Figure 12.** X-ray photoelectron spectroscopy (XPS) of (a) electropolished Cu foil (EP-Cu), (b, c) Cu\_KCl, (d, e) Cu\_KBr, and (f, g) Cu\_KI. ‘As-prep.’ indicates the as-prepared catalyst by electroplating or anodic halogenation. ‘Reduced’ indicates the catalyst was reduced in 0.1 M KHCO<sub>3</sub> electrolyte by LSV from its corresponding OCP to -1.8 V vs. Ag/AgCl at a scan rate of 5 mV/s. The halogenation time was 100s for Cu\_KCl, 100s for Cu\_KBr, and 30 s for Cu\_KI. Source data are provided as a Source Data file.



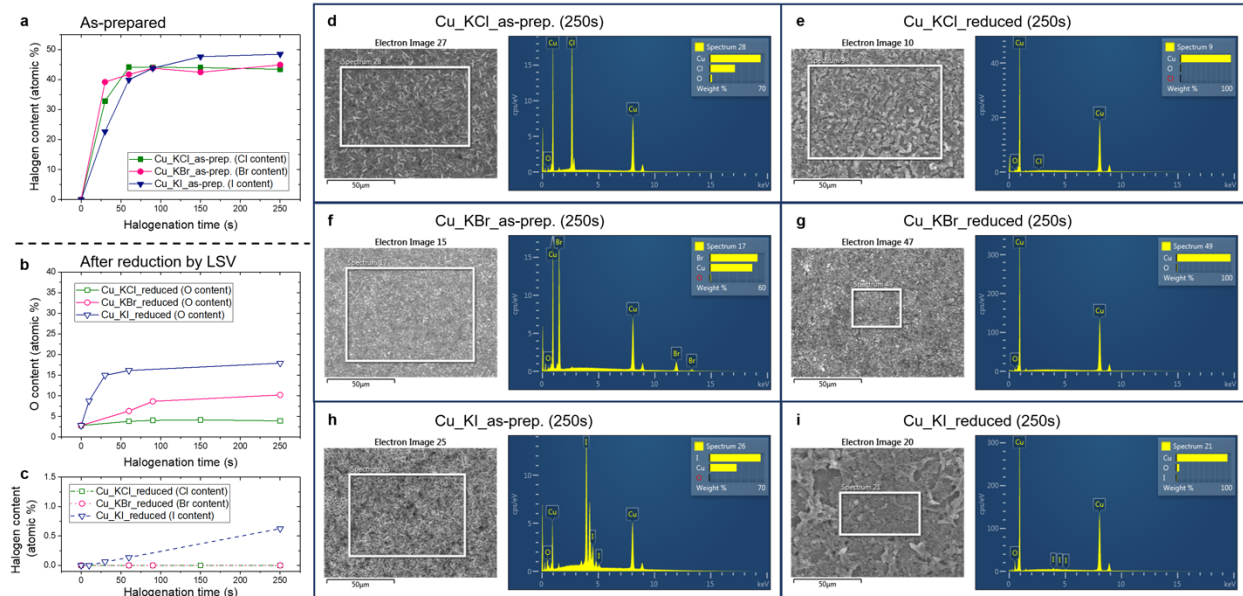

**Supplementary Figure 13.** Energy-dispersive X-ray spectroscopy (EDS). (a) Halogen content of as-prepared Cu\_KX (X = Cl, Br, and I) as a function of halogenation time. (b) Oxygen content of reduced Cu\_KX. (c) I content of reduced Cu\_KI. SEM images and corresponding raw EDS data of the as-prepared (d, f, h) and the reduced Cu\_KX (e, g, i) with halogenation time of 250 s. Source data are provided as a Source Data file.

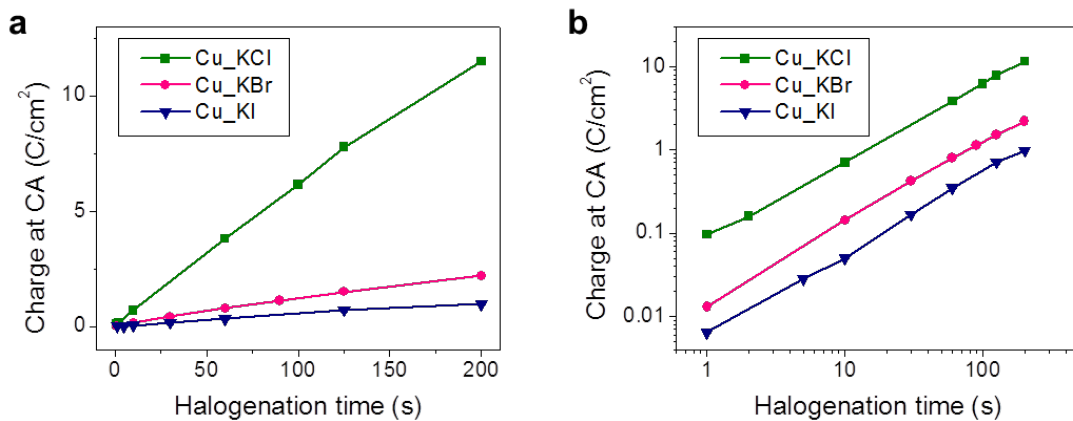

**Supplementary Figure 14.** Linear scale (a) and log-scale (b) plots of the amount of charge delivered by chronoamperometry (CA) to anodically halogenate Cu foils for different amounts of time. Source data are provided as a Source Data file.

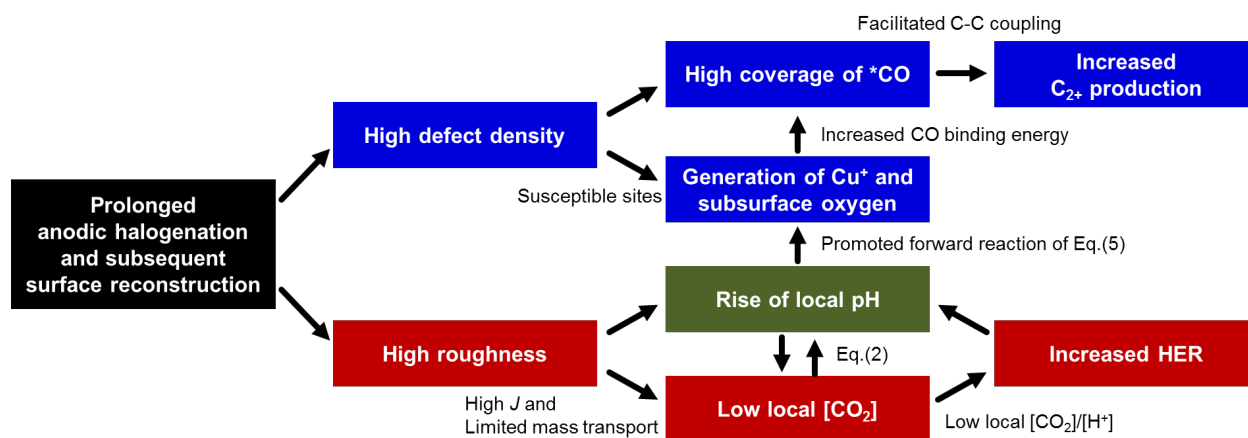

**Supplementary Scheme 1.** Flow diagram showing relationship of different outcomes caused by excessive anodic halogenation of Cu foils. Merits (blue boxes) and demerits (red boxes) of the impact of prolonged anodic halogenation on the FE of  $\text{C}_{2+}$  production in electrochemical  $\text{CO}_2$  RR.  $J$  is current density. The rise of local pH shown in the green box is the fulcrum (balance point) between merits and demerits of prolonged anodic halogenation.

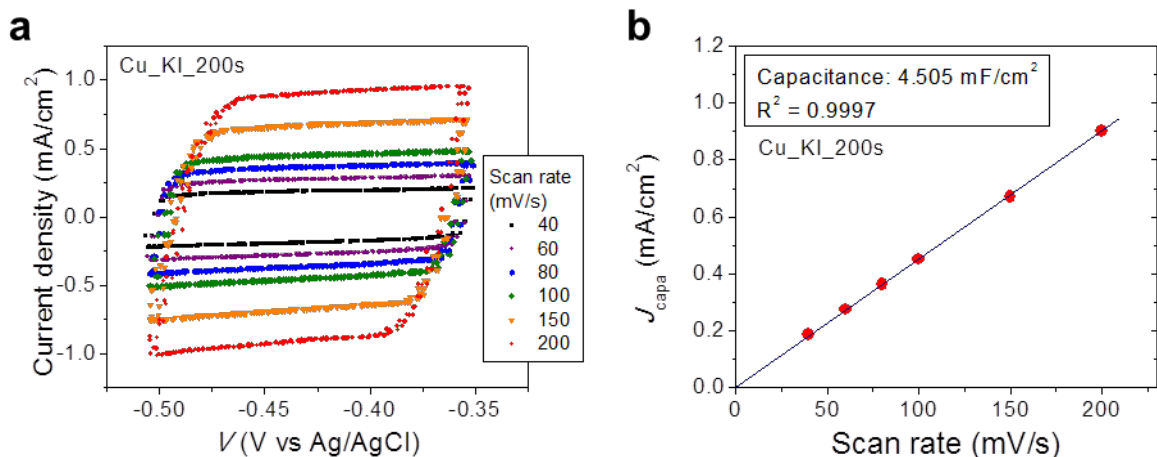

**Supplementary Figure 15.** Double-layer (DL) capacitance measurements using the method described in Mistry *et al.*<sup>4</sup> (a) Cyclic voltammetry (CV) data of reduced Cu\_KI (iodinated in KI for 200 s) at different scan rates between -0.35 V and -0.5 V vs Ag/AgCl, where faradaic processes do not occur in CO<sub>2</sub>-saturated 0.1 M KHCO<sub>3</sub>. (b) A plot of current density collected at -0.425 V vs. Ag/AgCl in CV as a function of the scan rate:  $J_{\text{capa}} = (J^+ - J^-)/2$ , where  $J^+$  is a positive current density at -0.425 V vs. Ag/AgCl and  $J^-$  is a negative current density at -0.425 V vs. Ag/AgCl. The slope of the linear regression gives the DL capacitance. Source data are provided as a Source Data file.

**Supplementary Note 3.** Calculation of concentrations of ions in CO<sub>2</sub>-saturated 0.1 M KHCO<sub>3</sub> electrolyte.

Concentration of ions were calculated according to the published method by Meenesh R. Singh *et al.*<sup>5</sup>.

Dissolution of CO<sub>2</sub> into the electrolyte is in equilibrium given by the Henry's constant ( $K_0$ ).

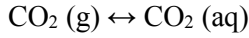

$$K_0 = C_{\text{CO}_2} / f_{\text{CO}_2}$$

where  $C_{\text{CO}_2}$  is the concentration of dissolved CO<sub>2</sub> and  $f_{\text{CO}_2}$  is the fugacity of CO<sub>2</sub> in the gas phase.

Temperature-dependence of  $K_0$  follows the empirical relationship:

$$\ln(K_0) = 93.4517(100/T) - 60.2409 + 23.358 \ln(T/100) + S[0.023517 - 0.023656(T/100) + 0.0047036(T/100)^2]$$

where  $T$  is the temperature in Kelvin and  $S$  is salinity in parts per thousand.

Concentrations of dissolved CO<sub>2</sub>, bicarbonate (HCO<sub>3</sub><sup>-</sup>), and carbonate (CO<sub>3</sub><sup>2-</sup>) ions are described by the equilibrium equations:

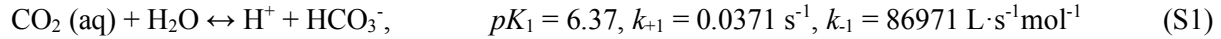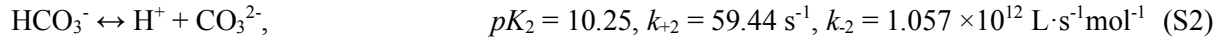

where  $K_1$  is the equilibrium constant for reaction (S1),  $k_{+1}$  is the forward rate constant of reaction (S1) and  $k_{-1}$  is the backward rate constant of reaction (S1),  $K_2$  is the equilibrium constant for reaction (S2),  $k_{+2}$  is the forward rate constant of reaction (S2) and  $k_{-2}$  is the backward rate constant of reaction (S2).

From the reaction (S1),

$$K_1 = [\text{H}^+][\text{HCO}_3^-]/[\text{CO}_2] \quad (\text{S3})$$

From the reaction (S2),

$$K_2 = [\text{H}^+][\text{CO}_3^{2-}]/[\text{HCO}_3^-] \quad (\text{S4})$$

Rearranging equations (S3) and (S4) gives

$$K_1[\text{CO}_2]/[\text{H}^+] = [\text{H}^+][\text{CO}_3^{2-}]/K_2 \quad (\text{S5})$$

There is a boundary condition that the initial concentration of KHCO<sub>3</sub> is 0.1 M and the added bicarbonate ions can be converted into CO<sub>2</sub> (aq) or carbonate ions:

$$0.1 = [\text{CO}_2] + [\text{HCO}_3^-] + [\text{CO}_3^{2-}] \quad (\text{S6})$$

Then the concentration of the dissolved CO<sub>2</sub> can be expressed as a function of [H<sup>+</sup>]:

$$[\text{CO}_2] = \frac{(0.1)[\text{H}^+]}{K_2 \left[ \frac{K_1}{[\text{H}^+]} + \frac{[\text{H}^+]}{K_2} + \frac{K_1}{K_2} \right]} \quad (\text{S7})$$

There is an additional generation term for dissolved CO<sub>2</sub> from a constant feed of gaseous CO<sub>2</sub>:

$$R_{\text{CO}_2, \text{feed}} = \beta K_0 f_{\text{CO}_2} \quad (\text{S8})$$

where  $\beta$  is the transfer coefficient ( $\beta = k_1 \alpha \delta$ ),  $k_1 \alpha$  is the volumetric mass-transfer coefficient (unit: s<sup>-1</sup>) on the liquid side of gas-liquid interface, and  $\delta$  is the fraction of inlet CO<sub>2</sub> transferred from the gas phase to the liquid phase. For this work,  $\beta = 0.33 \text{ s}^{-1}$  was used, which is the value used in Singh *et al.*<sup>5</sup>

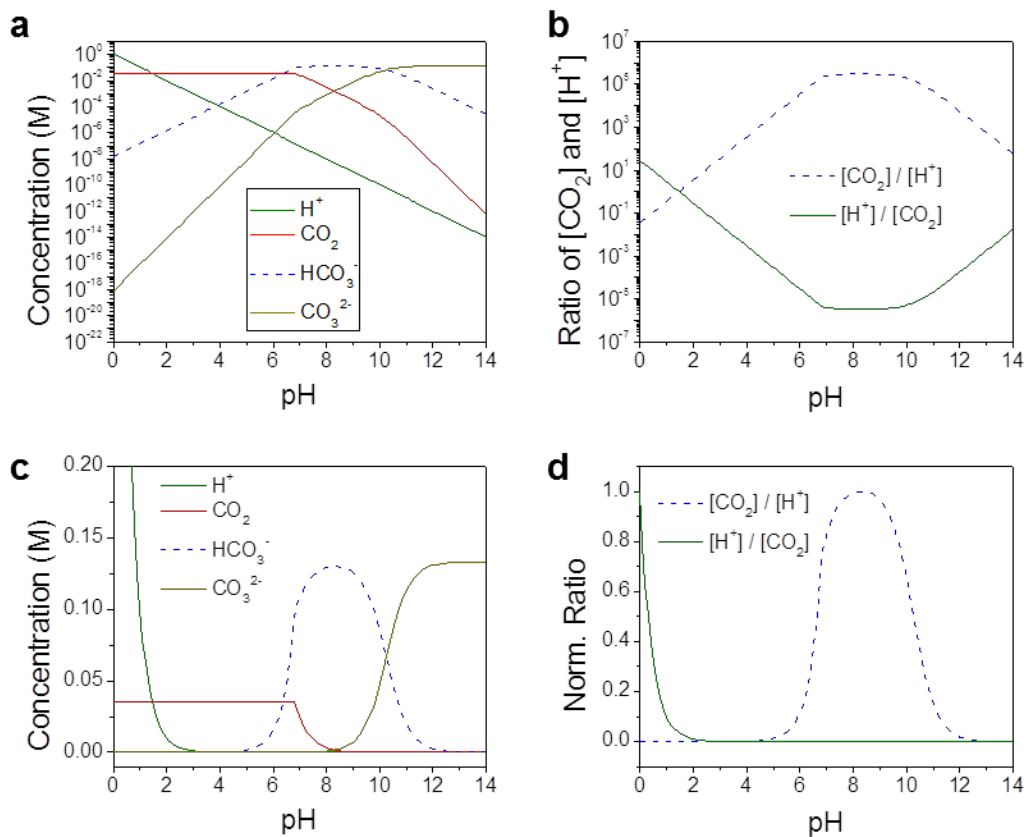

**Supplementary Figure 16.** Calculated concentration of ions in  $\text{CO}_2$ -saturated  $0.1 \text{ M KHCO}_3$  as a function of pH. (a) Log-scale concentration of proton, dissolved  $\text{CO}_2$ , bicarbonate and carbonate ions. (b) Log-scale concentration ratios of dissolved  $\text{CO}_2$  and proton. (c) Linear-scale concentrations of proton, dissolved  $\text{CO}_2$ , bicarbonate and carbonate ions. (d) Normalized concentration ratios of dissolved  $\text{CO}_2$  and protons in linear-scale. (c) and (d) are identical to Fig. 7b and c.

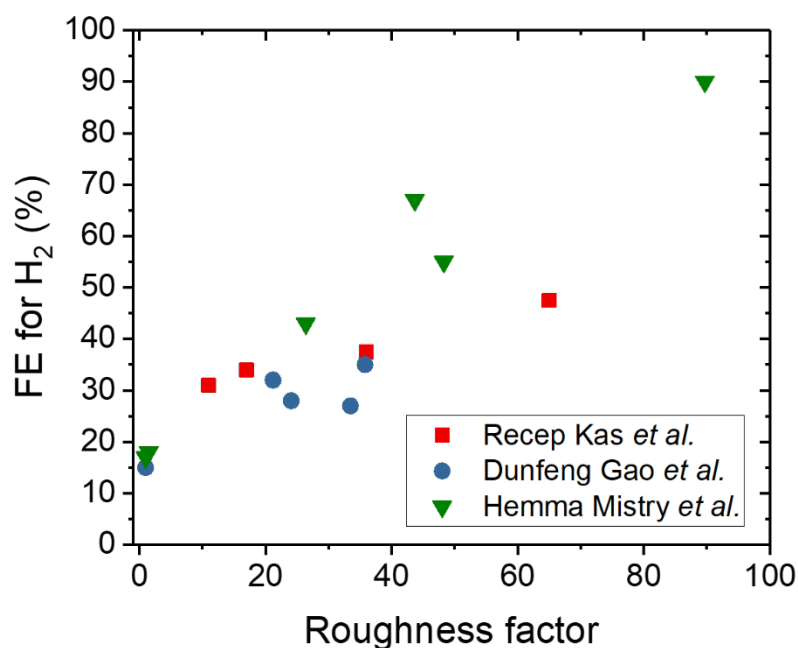

**Supplementary Figure 17.** FE of H<sub>2</sub> as a function of the roughness factor of Cu foils used to electrochemically reduce CO<sub>2</sub> in CO<sub>2</sub>-saturated 0.1 M KHCO<sub>3</sub> electrolyte. Data are taken from supplementary references [1,4,8].

**Supplementary Table 3.** The FE of H<sub>2</sub> and the roughness factor of Cu foils used to electrochemically reduce CO<sub>2</sub> in CO<sub>2</sub>-saturated 0.1 M KHCO<sub>3</sub> electrolyte. Data are taken from Supplementary Information References [1,4,8].

| Authors                    | Preparation method                                                        | Sample                                     | Roughness | FE of H <sub>2</sub> (%) | Overpotential (V vs. RHE) | Ref. |
|----------------------------|---------------------------------------------------------------------------|--------------------------------------------|-----------|--------------------------|---------------------------|------|
| Dunfeng Gao <i>et al.</i>  | Plasma-activated copper nanocubes                                         | EP-Cu                                      | 1         | 15                       | -1.02 V                   | 1    |
|                            |                                                                           | Cube as-prepared                           | 35.8      | 35                       |                           |      |
|                            |                                                                           | Cube O <sub>2</sub> 20s                    | 24.1      | 28                       |                           |      |
|                            |                                                                           | Cube Ar 5min                               | 21.2      | 32                       |                           |      |
|                            |                                                                           | Cube H <sub>2</sub> 4min                   | 33.5      | 27                       |                           |      |
| Hemma Mistry <i>et al.</i> | Plasma-activated copper foil                                              | EP-Cu                                      | 1         | 17                       | -0.975 V                  | 4    |
|                            |                                                                           | H <sub>2</sub> 100W 2min                   | 1.5       | 18                       |                           |      |
|                            |                                                                           | O <sub>2</sub> 20W 2min                    | 26.4      | 43                       |                           |      |
|                            |                                                                           | O <sub>2</sub> 100W 2min                   | 43.7      | 67                       |                           |      |
|                            |                                                                           | O <sub>2</sub> 100W 2 min + H <sub>2</sub> | 48.3      | 55                       |                           |      |
|                            |                                                                           | O 100W 10min                               | 89.7      | 90                       |                           |      |
| Recep Kas <i>et al.</i>    | Electrodeposition of Cu <sub>2</sub> O by reduction of copper(II) lactate | 3 C/cm <sup>2</sup>                        | 11        | 31                       | -1.1 V                    | 8    |
|                            |                                                                           | 5 C/cm <sup>2</sup>                        | 17        | 34                       |                           |      |
|                            |                                                                           | 7 C/cm <sup>2</sup>                        | 36        | 37.5                     |                           |      |
|                            |                                                                           | 11 C/cm <sup>2</sup>                       | 65        | 47.5                     |                           |      |

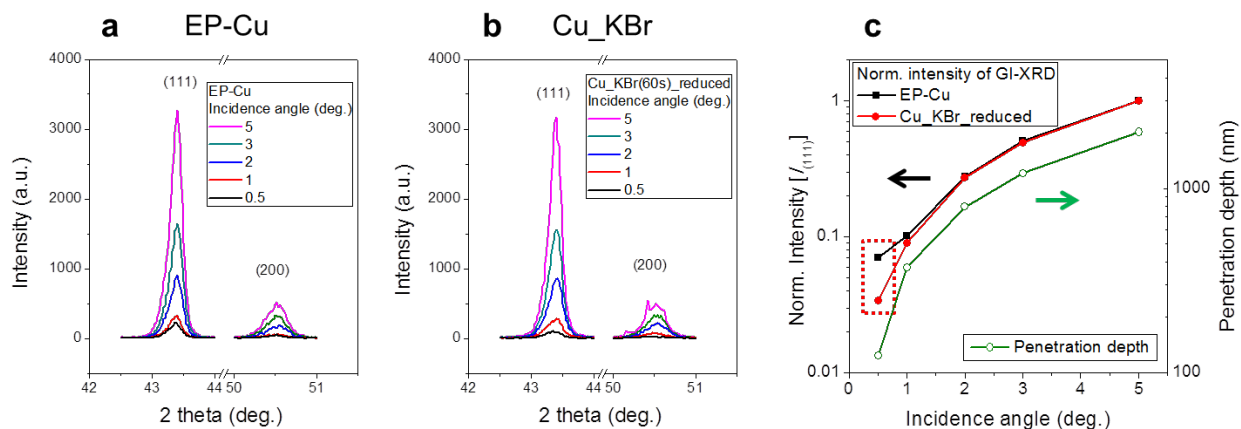

**Supplementary Figure 18.** GI-XRD data of electropolished Cu (EP-Cu) and Cu-KBr collected at different incidence angles from  $0.5^\circ$  to  $5^\circ$  to show that Cu(I)-halide derived catalysts have a higher density of defect sites than EP-Cu. (a) GI-XRD data of EP-Cu and (b) GI-XRD data of Cu\_KBr reduced by LSV. (c) The intensity of the GI-XRD peak at  $2\theta = 43.3^\circ$  [corresponding to (111)] in (a) and (b) plotted as a function of incidence angle. The intensity was normalized by the intensity measured at an incidence angle of  $5^\circ$  to eliminate sample-to-sample variations. Because diffraction requires periodic structures, a surface with a high density of defects (i.e., low crystallinity) will exhibit GI-XRD peaks of lower intensity than those of a surface with fewer defects. Thus, the intensity of GI-XRD signal of Cu\_KBr decreases relative to that of EP-Cu (highlighted in the dashed red rectangle) due to a high density of defect sites at the surface of Cu\_KBr. Also included in (c) is the X-ray penetration depth in Cu plotted as a function of incidence angle. The GI-XRD measurement becomes more surface-sensitive as the incidence angle and corresponding penetration depth decrease (i.e., penetration depth is calculated to be 2025 nm or 123 nm at incidence angle of  $5^\circ$  or  $0.5^\circ$ , respectively). It should be noted that porous or rough surfaces of Cu(I)-halide-derived catalysts may alter refraction at the Cu surface, making *quantitative* determination of defect density with GI-XRD difficult. Source data are provided as a Source Data file.



**Supplementary Note 4.** Calculation of the penetration depth as a function of incidence angle

The penetration depth as a function of incidence angle was calculated as:<sup>6</sup>

$$z_{1/e} = \frac{\lambda}{4\pi} \sqrt{\frac{2}{\sqrt{(a_i^2 - a_c^2 + 4\beta^2) - (a_i^2 - a_c^2)}}$$

where  $z_{1/e}$  is the depth at which the intensity is reduced to 1/e,  $\lambda$  is the wavelength of the X-ray,  $a_i$  is the incidence angle of the X-ray,  $a_c$  is the critical angle of copper,  $\beta$  is the imaginary part of the refractive index of copper or the extinction coefficient. The refractive index can be expressed by  $r = 1 - \delta + i\beta$ , where  $\delta$  is the deviation from the real part of the refractive index. Values for  $\delta$  and  $\beta$  of copper at  $\lambda = 1.54 \text{ \AA}$  are  $2.405 \times 10^{-5}$  and  $5.58 \times 10^{-7}$ , respectively.<sup>6</sup> The critical angle can be calculated by  $a_c = (2\delta)^{0.5}$ , which leads to  $a_c = 6.935 \times 10^{-3} \text{ radians} = 0.3974^\circ$  at  $\lambda = 1.54 \text{ \AA}$ . The critical angle calculated at different wavelengths are given in Supplementary Table 3. The trend of the calculated  $a_c$  is consistent with the empirical value of  $\sim 0.33^\circ$  measured at 9.1 keV.<sup>7</sup>

**Supplementary Table 4.** Optical constants and the critical angle of copper at x-ray region.

| Wavelength<br>( $\text{\AA}$ ) | Photon energy<br>(eV) | $\delta$               | $\beta$               | $a_c$ (rad.) | $a_c$ ( $^\circ$ ) |
|--------------------------------|-----------------------|------------------------|-----------------------|--------------|--------------------|
| 1.54                           | 8.055                 | $2.405 \times 10^{-5}$ | $5.58 \times 10^{-7}$ | 0.006935     | 0.3974             |
| 1.392                          | 8.912                 | $1.785 \times 10^{-5}$ | $3.76 \times 10^{-7}$ | 0.005975     | 0.3423             |
| 1.281                          | 9.684                 | $1.672 \times 10^{-5}$ | $23.5 \times 10^{-7}$ | 0.005783     | 0.3313             |

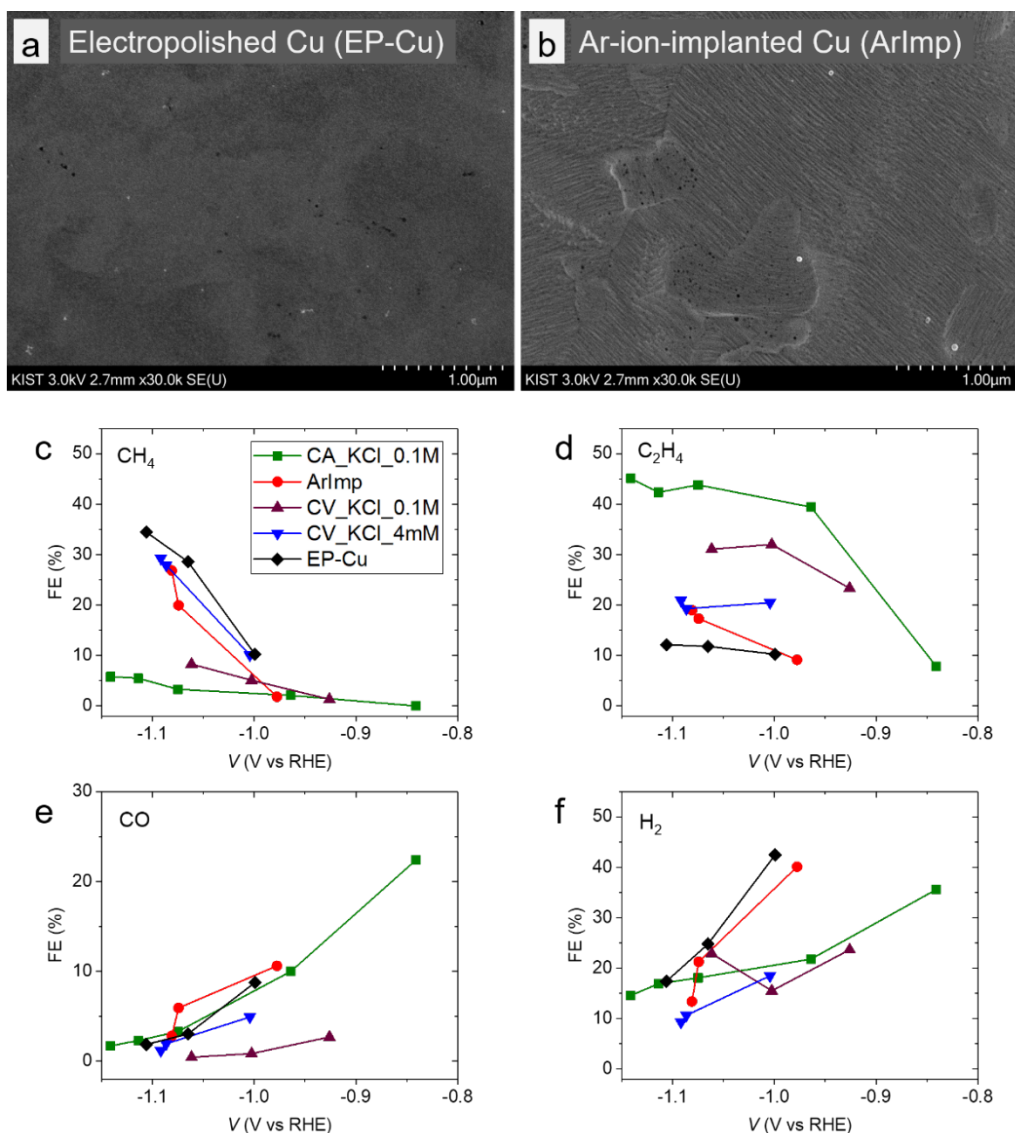

**Supplementary Figure 19.** Comparison of different methods for generating surface defects on Cu catalysts for electrochemical CO<sub>2</sub> RR. SEM images of (a) electropolished Cu (**EP-Cu**) and (b) Ar-ion-implanted Cu. Plots of FE for (c) CH<sub>4</sub>, (d) C<sub>2</sub>H<sub>4</sub>, (e) CO, and (f) H<sub>2</sub> as a function of applied potential. Legend abbreviations: **CA\_KCl\_0.1M** corresponds to a Cu catalyst prepared via anodic halogenation (our method) using chronoamperometry (CA) in aqueous 0.1 M KCl at 1.1 V vs. Ag/AgCl; **ArImp** corresponds to a Cu catalyst subjected to Ar-ion-implantation; **CV\_KCl\_0.1M** corresponds to a Cu catalyst prepared by electrochemical cycling (Ref 41, Chen *et al.*) in aqueous 0.1 M KCl using five triangular potential scans ranging from 0.24 V to 1.74 V vs. RHE at a scan rate of 500 mV/s with the potential held at the positive and negative limits for 10 and 5 seconds, respectively, for each cycle; **CV\_KCl\_4mM** corresponds to a Cu catalyst prepared by three electrochemical cycles (Ref 14, Roberts *et al.*) between -1.15 and 0.9 V vs. RHE in 4 mM KCl + 0.1 M KHCO<sub>3</sub>. The FE for C<sub>2</sub>H<sub>4</sub> (19.0 % at -1.081 V) is enhanced at **ArImp** compared to **EP-Cu** (12.15 % at -1.106 V). The FE of C<sub>2</sub>H<sub>4</sub> at **CV\_KCl\_4mM** was only 21%, reflecting the low concentration of KCl (4 mM) used in this method and consequential low density of defects generated. The highest FE for C<sub>2</sub>H<sub>4</sub> (45%) was observed at **CA\_KCl\_0.1M**. Source data are provided as a Source Data file.

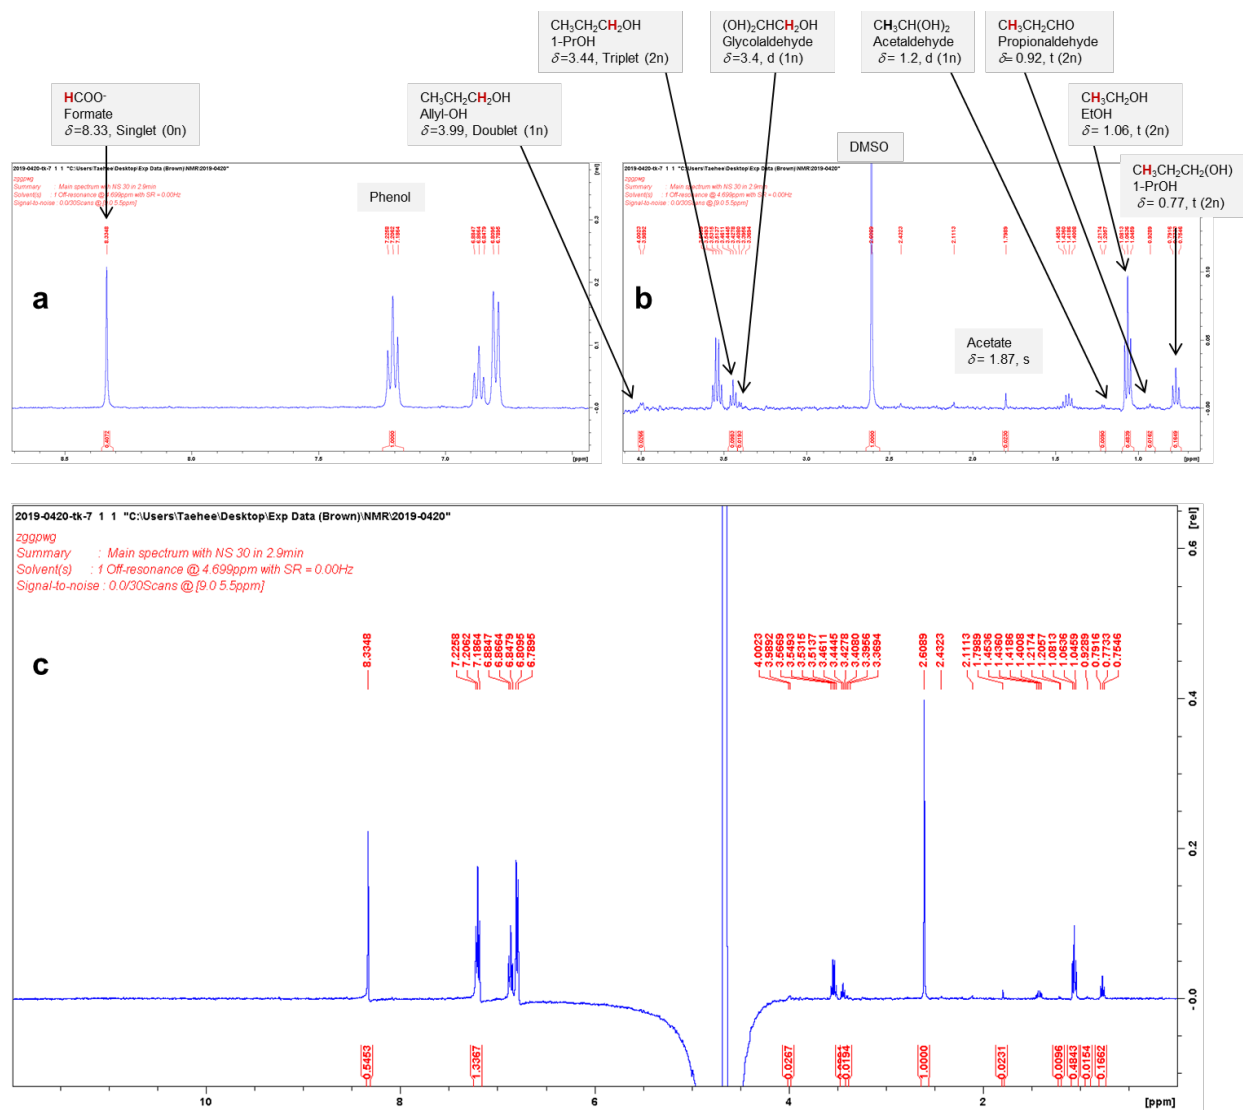

**Supplementary Figure 20.** NMR analysis of liquid products produced from the electrochemical CO<sub>2</sub> RR. The spectrum shown is typical and corresponds to a reaction catalyzed by Cu<sub>2</sub>Br (with anodic bromination time of 200 s). (a) Processed and assigned NMR peaks downfield to the suppressed water peak (chemical shift = 4.7 ppm). (b) Processed and assigned NMR peaks upfield to the suppressed water peak. (c) Raw data.

## Supplementary Note 5. Calculation of Faradaic efficiency

### Calculation of Faradaic efficiency for gas products:

$$FE_{gas}(\%) = \frac{I}{I_{total}} = \frac{zF \left[ \frac{C_{gas} v / 60}{10^6 V_m} \right]}{I_{total}} \times 100$$

where I = current used for generating a particular product, mA;

$I_{total}$  = total current used in bulk electrolysis at time when GC sampling was performed, mA;

$z$  = number of electrons transferred to produce a particular product;

$F$  = Faraday's constant, 96485 C/mol;

$C_{gas}$  = volume concentration of gas product as determined by GC, ppm;

$v$  = volume flow rate of CO<sub>2</sub> gas, mL/min;

$V_m$  = molar volume of an ideal gas at 1 atm, L/mol.

### Calculation of Faradaic efficiency for liquid products:

$$FE_{liquid}(\%) = \frac{Q}{Q_{total}} = \frac{zF [C_{liquid} V_{cath}]}{Q_{total}} \times 100$$

where Q = charge used for generating a particular product, C;

$Q_{total}$  = total amount of charge flowed in bulk electrolysis for entire reaction time, C;

$C_{liquid}$  = molar concentration of liquid product as determined by NMR, mol/L;

$V_{cath}$  = volume of catholyte, L.

**Supplementary Table 5.** Faradaic efficiencies of products obtained from electrochemical CO<sub>2</sub> RR vs. applied potential using Cu\_KX catalysts shown in Fig 5.

| Catalyst         | $V_{\text{appl}}$<br>(Ag/AgCl) | $J$<br>(mA/cm <sup>2</sup> ) | $V_{\text{comp}}$<br>(Ag/AgCl) | $V_{\text{comp}}$<br>(RHE) | FE (%) |                 |                               |                |                   |      |      |       |       |      |       |     |       |
|------------------|--------------------------------|------------------------------|--------------------------------|----------------------------|--------|-----------------|-------------------------------|----------------|-------------------|------|------|-------|-------|------|-------|-----|-------|
|                  |                                |                              |                                |                            | CO     | CH <sub>4</sub> | C <sub>2</sub> H <sub>4</sub> | H <sub>2</sub> | HCOO <sup>-</sup> | EtOH | PrOH | Other | Total | C1   | C2    | C3  | C2+   |
| EP_Cu            | -1.11                          | 0.12                         | -1.11                          | -0.509                     | 0      | 0               | 0                             | 93             | 6                 | 0    | 0    | 0     | 99    | 6    | 0     | 0   | 0     |
|                  | -1.31                          | 0.39                         | -1.30                          | -0.702                     | 0.5    | 0               | 0                             | 89.1           | 9.2               | 0    | 0    | 0     | 98.9  | 9.8  | 0     | 0   | 0     |
|                  | -1.51                          | 1.72                         | -1.47                          | -0.871                     | 17.4   | 0               | 0                             | 42.9           | 36.1              | 0    | 0    | 0     | 96.4  | 53.5 | 0     | 0   | 0     |
|                  | -1.71                          | 3.91                         | -1.61                          | -1.015                     | 23.4   | 11.5            | 12.17                         | 19.4           | 28.5              | 1.2  | 0    | 0.1   | 96.2  | 63.3 | 13.49 | 0   | 13.49 |
|                  | -1.91                          | 9.23                         | -1.72                          | -1.122                     | 10.7   | 35.7            | 18.08                         | 10.8           | 15.9              | 3    | 1.6  | 2.1   | 97.9  | 62.3 | 23.23 | 1.6 | 24.84 |
|                  | -2.11                          | 19.59                        | -1.78                          | -1.182                     | 3.6    | 54.0            | 13.28                         | 7.2            | 9.1               | 4.4  | 0.7  | 5.5   | 97.6  | 66.6 | 20.39 | 3.4 | 23.82 |
| Cu_KCl<br>(100s) | -1.11                          | 0.92                         | -1.10                          | -0.504                     | 11.3   | 0               | 0                             | 81.1           | 6.7               | 0    | 0    | 0     | 99.1  | 18   | 0     | 0   | 0     |
|                  | -1.31                          | 2.62                         | -1.28                          | -0.687                     | 28.4   | 0               | 0                             | 41.9           | 28.7              | 0    | 0    | 0     | 99    | 57.1 | 0     | 0   | 0     |
|                  | -1.51                          | 7.15                         | -1.44                          | -0.841                     | 22.4   | 0               | 7.89                          | 35.6           | 33.3              | 0    | 0    | 0     | 99.1  | 55.6 | 7.9   | 0   | 7.89  |
|                  | -1.71                          | 16.91                        | -1.56                          | -0.964                     | 10.0   | 2.1             | 39.45                         | 21.8           | 17.5              | 4.2  | 3.8  | 0.4   | 99.3  | 29.6 | 44.0  | 3.8 | 47.8  |
|                  | -1.91                          | 31.10                        | -1.67                          | -1.075                     | 3.3    | 3.3             | 43.85                         | 18.1           | 14.7              | 8.0  | 3.9  | 3.4   | 98.6  | 21.2 | 52.6  | 6.6 | 59.2  |
|                  | -2.01                          | 36.20                        | -1.71                          | -1.114                     | 2.3    | 5.5             | 42.35                         | 16.9           | 13                | 8.3  | 4.0  | 5.8   | 98.1  | 20.8 | 51.9  | 8.6 | 60.47 |
|                  | -2.11                          | 45.45                        | -1.74                          | -1.141                     | 1.7    | 5.8             | 45.14                         | 14.6           | 11.2              | 11.0 | 3.7  | 5.7   | 98.9  | 18.7 | 57.7  | 7.9 | 65.62 |
| Cu_KBr<br>(60s)  | -1.11                          | 0.75                         | -1.1                           | -0.503                     | 13.4   | 0               | 0                             | 80             | 3.9               | 0    | 0    | 0     | 97.3  | 17.4 | 0     | 0   | 0     |
|                  | -1.31                          | 2.57                         | -1.28                          | -0.678                     | 25.3   | 0               | 0                             | 45.4           | 26.3              | 0    | 0    | 0     | 97    | 51.6 | 0     | 0   | 0     |
|                  | -1.51                          | 6.29                         | -1.43                          | -0.827                     | 24.2   | 0               | 2.38                          | 35.1           | 38.1              | 0    | 0    | 0     | 99.7  | 62.2 | 2.4   | 0   | 2.38  |
|                  | -1.71                          | 11.97                        | -1.57                          | -0.969                     | 8.4    | 4.4             | 27.56                         | 22.4           | 31.3              | 2.1  | 2.5  | 0.4   | 99.2  | 44.1 | 30.1  | 2.5 | 32.65 |
|                  | -1.91                          | 24.17                        | -1.64                          | -1.041                     | 2.5    | 8.6             | 46.81                         | 14.9           | 11.7              | 8.4  | 3.6  | 1.2   | 97.8  | 22.9 | 56.4  | 3.6 | 60.07 |
|                  | -2.01                          | 32.00                        | -1.71                          | -1.11                      | 1.6    | 8.1             | 51.2                          | 13.6           | 7.1               | 11   | 3.9  | 1.6   | 98.1  | 16.8 | 63.8  | 3.9 | 67.65 |
|                  | -2.11                          | 42.67                        | -1.75                          | -1.151                     | 1.0    | 9.6             | 49.47                         | 11.7           | 5.6               | 12.8 | 3.4  | 6.1   | 98.2  | 16.2 | 65.4  | 6.3 | 71.71 |
| Cu_KI<br>(1s)    | -1.11                          | 0.87                         | -1.1                           | -0.500                     | 5.6    | 0               | 0                             | 83.9           | 8.8               | 0    | 0    | 0     | 98.3  | 14.4 | 0     | 0   | 0     |
|                  | -1.31                          | 3.39                         | -1.27                          | -0.674                     | 23.4   | 0               | 0                             | 40.8           | 35.1              | 0    | 0    | 0     | 99.3  | 58.5 | 0     | 0   | 0     |
|                  | -1.51                          | 7.95                         | -1.42                          | -0.825                     | 13.3   | 0               | 0.88                          | 36             | 48.9              | 0    | 0    | 0     | 99.1  | 62.2 | 0.9   | 0   | 0.88  |
|                  | -1.71                          | 14.1                         | -1.57                          | -0.974                     | 10.6   | 4.3             | 25.52                         | 24.2           | 28.0              | 3.2  | 2.7  | 0.2   | 98.6  | 42.9 | 28.9  | 2.7 | 31.59 |
|                  | -1.91                          | 27.55                        | -1.66                          | -1.060                     | 3.0    | 10.4            | 42.63                         | 12.6           | 13.5              | 8.2  | 2.7  | 5.5   | 98.5  | 27   | 52.7  | 6.3 | 58.95 |
|                  | -2.01                          | 35.14                        | -1.72                          | -1.125                     | 2.0    | 11.9            | 43.18                         | 9.8            | 10.1              | 9.6  | 3.3  | 8.8   | 98.6  | 24   | 56.0  | 8.8 | 64.79 |
|                  | -2.11                          | 39.96                        | -1.74                          | -1.146                     | 2.0    | 14.0            | 44.54                         | 8.9            | 8.7               | 9.8  | 3.2  | 7.7   | 98.8  | 24.7 | 57.4  | 7.8 | 65.21 |

**Supplementary Table 6.** Faradaic efficiencies of products obtained from electrochemical CO<sub>2</sub> RR using Cu\_KX catalysts anodically halogenated for different lengths of time (see Fig 6).

| Catalyst | Halog. Time (s) | $V_{app1}$ (Ag/AgCl) | $J$ (mA/cm <sup>2</sup> ) | $V_{comp}$ (Ag/AgCl) | $V_{comp}$ (RHE) | FE (%) |                 |                               |                               |                |                   |      |      |       |       |      |       |     |       |
|----------|-----------------|----------------------|---------------------------|----------------------|------------------|--------|-----------------|-------------------------------|-------------------------------|----------------|-------------------|------|------|-------|-------|------|-------|-----|-------|
|          |                 |                      |                           |                      |                  | CO     | CH <sub>4</sub> | C <sub>2</sub> H <sub>4</sub> | C <sub>2</sub> H <sub>6</sub> | H <sub>2</sub> | HCOO <sup>-</sup> | EtOH | PrOH | Other | Total | C1   | C2    | C3  | C2+   |
| Cu_KCl   | 2               | -2.11                | 38.15                     | -1.77                | -1.17            | 1.9    | 25.6            | 40.8                          | 0                             | 5.8            | 6.0               | 8.5  | 1.6  | 8.7   | 98.9  | 33.4 | 53.5  | 6.2 | 59.64 |
|          | 10              | -2.11                | 43.54                     | -1.73                | -1.13            | 1.6    | 10.8            | 48.3                          | 0                             | 8.7            | 7.9               | 11   | 3.3  | 7.2   | 98.7  | 20.3 | 61.6  | 8.1 | 69.73 |
|          | 60              | -2.11                | 40.31                     | -1.69                | -1.09            | 1.6    | 4.1             | 50.2                          | 0                             | 12             | 9.7               | 10.9 | 4.3  | 5.3   | 98.1  | 15.4 | 62.9  | 7.9 | 70.73 |
|          | 100             | -2.11                | 41.54                     | -1.72                | -1.12            | 1.8    | 4.9             | 49                            | 0                             | 14.2           | 8.4               | 10.9 | 4.1  | 5.1   | 98.5  | 15.2 | 61.3  | 7.8 | 69.15 |
|          | 125             | -2.11                | 40.77                     | -1.71                | -1.11            | 2.1    | 3.2             | 48.9                          | 0                             | 14.6           | 9.8               | 10.6 | 4.7  | 5.7   | 99.5  | 15   | 61.5  | 8.4 | 69.84 |
|          | 200             | -2.11                | 41.54                     | -1.66                | -1.06            | 1.7    | 4.0             | 48.2                          | 0                             | 16.6           | 7.6               | 11.6 | 4.1  | 4.7   | 98.5  | 13.3 | 61.7  | 6.9 | 68.58 |
|          | 300             | -2.11                | 51.85                     | -1.69                | -1.09            | 1.5    | 4.4             | 47.8                          | 0                             | 17.4           | 7.7               | 11.2 | 4.2  | 4.1   | 98.3  | 13.6 | 60.7  | 6.6 | 67.28 |
| Cu_KBr   | 1               | -2.11                | 29.6                      | -1.76                | -1.16            | 2.3    | 31.1            | 32.85                         | 0                             | 7.6            | 9.0               | 7.0  | 1.9  | 5.4   | 97.0  | 42.3 | 43.7  | 3.5 | 47.17 |
|          | 10              | -2.11                | 38.42                     | -1.73                | -1.13            | 1.6    | 12.9            | 45.31                         | 0                             | 9.3            | 8.7               | 10.5 | 3.4  | 5.3   | 97.1  | 23.2 | 58.0  | 6.5 | 64.56 |
|          | 30              | -2.11                | 40.0                      | -1.74                | -1.14            | 1.6    | 9.6             | 46.22                         | 0                             | 10.3           | 9.3               | 10.3 | 3.8  | 7.2   | 98.5  | 20.4 | 58.9  | 8.8 | 67.7  |
|          | 60              | -2.11                | 40.75                     | -1.66                | -1.06            | 1.8    | 5.5             | 48.62                         | 0                             | 12.0           | 9.6               | 11.4 | 3.7  | 6.5   | 99.2  | 16.9 | 62.2  | 8.0 | 70.27 |
|          | 90              | -2.11                | 43.33                     | -1.68                | -1.08            | 2.3    | 1.7             | 50.94                         | 0                             | 13.8           | 8.7               | 12.0 | 4.4  | 4.2   | 98.0  | 12.6 | 64.4  | 7.2 | 71.54 |
|          | 125             | -2.11                | 45.33                     | -1.68                | -1.08            | 1.6    | 4.2             | 49.17                         | 0                             | 13.9           | 9.0               | 11.9 | 4.0  | 4.9   | 98.7  | 14.9 | 62.7  | 7.2 | 69.95 |
|          | 200             | -2.11                | 42.4                      | -1.75                | -1.15            | 1.7    | 3.8             | 49.07                         | 0                             | 15.2           | 8.4               | 11.6 | 3.9  | 4.7   | 98.4  | 13.9 | 62.2  | 7.1 | 69.33 |
|          | 300             | -2.11                | 41.08                     | -1.73                | -1.13            | 1.7    | 5.0             | 46.10                         | 0                             | 15.1           | 7.9               | 12.0 | 4.0  | 6.1   | 98.0  | 14.7 | 60.6  | 7.7 | 68.24 |
| Cu_KI    | 1               | -2.11                | 37.6                      | -1.69                | -1.09            | 2.2    | 9.6             | 45.69                         | 0                             | 9.3            | 12.4              | 9.0  | 3.4  | 6.1   | 97.7  | 24.2 | 56.61 | 7.6 | 64.25 |
|          | 10              | -2.11                | 40.0                      | -1.69                | -1.09            | 1.5    | 8.4             | 49.99                         | 0                             | 9.3            | 9.2               | 13.8 | 5.2  | 3.6   | 98.0  | 19.1 | 65.3  | 7.2 | 72.58 |
|          | 30              | -2.11                | 43.89                     | -1.68                | -1.08            | 1.2    | 4.5             | 49.57                         | 0                             | 12.3           | 10.1              | 13.5 | 5.3  | 3.1   | 97.0  | 15.8 | 63.5  | 7.9 | 71.4  |
|          | 60              | -2.11                | 54.86                     | -1.66                | -1.06            | 1.3    | 2.5             | 48.81                         | 0                             | 14.1           | 12.4              | 12.7 | 6.1  | 3.4   | 98.5  | 16.2 | 62.5  | 8.4 | 70.91 |
|          | 125             | -2.11                | 52.74                     | -1.64                | -1.04            | 1.6    | 0.9             | 48.02                         | 0.5                           | 16.9           | 9.5               | 12.4 | 7.7  | 1.6   | 97.4  | 12.8 | 60.7  | 7.3 | 68.03 |
|          | 300             | -2.11                | 54.63                     | -1.69                | -1.09            | 1.4    | 0.2             | 45.44                         | 1.2                           | 19.9           | 9.6               | 13.2 | 6.0  | 1.8   | 97.7  | 11.2 | 59.4  | 6.8 | 66.2  |

**Supplementary Note 6.** Electrochemical CO<sub>2</sub> RR on a control sample prepared without halide ions

To illustrate the effectiveness of anodic halogenation on electrochemical CO<sub>2</sub> RR catalysis, a control sample of Cu foil oxidized in 0.05 M K<sub>2</sub>SO<sub>4</sub> (Cu\_K<sub>2</sub>SO<sub>4</sub>) was used as a catalyst. XRD data of Cu\_K<sub>2</sub>SO<sub>4</sub> (Fig. 2b) reveals the formation of Cu<sub>2</sub>O. SEM images of Cu\_K<sub>2</sub>SO<sub>4</sub> shown in Supplementary Figure 8 reveals a corresponding surface morphology of octahedrons with predominantly (111) facets. Electrochemical CO<sub>2</sub> RR experiments were done under the same conditions as those using Cu\_KX catalysts. A Cu\_K<sub>2</sub>SO<sub>4</sub> catalyst oxidized for 300 s produced C<sub>2</sub>H<sub>4</sub> with a FE of 35.8 % and C<sub>2+</sub> products with a FE of 47.7 %, which are higher than those obtained using electropolished Cu but lower than those using Cu(I)-halide-derived catalysts. These results show the effectiveness of anodic halogenation in producing catalysts that favor C<sub>2+</sub> products from the electrochemical CO<sub>2</sub> RR.

**Supplementary Table 7.** Faradaic efficiencies of products obtained from electrochemical CO<sub>2</sub> RR using Cu catalysts oxidized in 0.05 M K<sub>2</sub>SO<sub>4</sub>.

| Catalyst                          | Ox. Time (s) | $V_{\text{appl}}$ (Ag/AgCl) | $J$ (mA/cm <sup>2</sup> ) | $V_{\text{comp}}$ (Ag/AgCl) | $V_{\text{comp}}$ (RHE) | FE (%) |                 |                               |                |                   |                  |      |      |       |       |       |      |       |
|-----------------------------------|--------------|-----------------------------|---------------------------|-----------------------------|-------------------------|--------|-----------------|-------------------------------|----------------|-------------------|------------------|------|------|-------|-------|-------|------|-------|
|                                   |              |                             |                           |                             |                         | CO     | CH <sub>4</sub> | C <sub>2</sub> H <sub>4</sub> | H <sub>2</sub> | HCOO <sup>-</sup> | AcO <sup>-</sup> | EtOH | PrOH | Total | C1    | C2    | C3   | C2+   |
| Cu_K <sub>2</sub> SO <sub>4</sub> | 100          | -2.01                       | 29.0                      | -1.61                       | -1.01                   | 3.6    | 31.7            | 32.44                         | 10.1           | 14.06             | 0.30             | 4.95 | 1.34 | 98.6  | 49.41 | 37.69 | 1.34 | 39.03 |
|                                   | 300          | -2.01                       | 34.3                      | -1.69                       | -1.09                   | 1.3    | 27.0            | 35.85                         | 14.0           | 8.70              | 0.21             | 8.61 | 3.05 | 98.8  | 37.05 | 44.68 | 3.05 | 47.73 |

**Supplementary Table 8.** Double-layer (DL) capacitance and roughness of Cu\_KX.

| Cu_KCl   |                                   |                  | Cu_KBr   |                                   |                  | Cu_KI    |                                   |                  |
|----------|-----------------------------------|------------------|----------|-----------------------------------|------------------|----------|-----------------------------------|------------------|
| Time (s) | Capacitance (mF/cm <sup>2</sup> ) | Roughness factor | Time (s) | Capacitance (mF/cm <sup>2</sup> ) | Roughness factor | Time (s) | Capacitance (mF/cm <sup>2</sup> ) | Roughness factor |
| 1        | 0.22                              | 1.83             | 1        | 0.25                              | 2.12             | 1        | 0.76                              | 6.50             |
| 2        | 0.33                              | 2.79             | 10       | 0.54                              | 4.62             | 5        | 0.74                              | 6.25             |
| 10       | 0.83                              | 7.03             | 30       | 0.81                              | 6.86             | 10       | 0.77                              | 6.52             |
| 60       | 1.41                              | 11.98            | 60       | 0.89                              | 7.60             | 30       | 1.31                              | 11.12            |
| 100      | 1.59                              | 13.50            | 125      | 1.11                              | 9.45             | 60       | 2.01                              | 17.06            |
| 125      | 1.71                              | 14.53            | 200      | 1.21                              | 10.26            | 125      | 3.60                              | 30.56            |
| 200      | 1.99                              | 16.90            |          |                                   |                  | 200      | 4.51                              | 38.28            |

The capacitance of the electropolished Cu was 0.1177 mF/cm<sup>2</sup>. The roughness factor was determined by:  
roughness factor = (capacitance of a catalyst)/(capacitance of electropolished Cu)



## Supplementary References

1. Gao, D. *et al.* Plasma-activated copper nanocube catalysts for efficient carbon dioxide electroreduction to hydrocarbons and alcohols. *ACS Nano* **11**, 4825-4831 (2017).
2. Powell, C. J., Jablonski, A. & Salvat, F. NIST databases with electron elastic-scattering cross sections, inelastic mean free paths, and effective attenuation lengths. *Surface and Interface Analysis: An International Journal devoted to the development and application of techniques for the analysis of surfaces, interfaces and thin films* **37**, 1068-1071 (2005).
3. Prencipe, I., Dellasega, D., Zani, A., Rizzo, D. & Passoni, M. Energy dispersive x-ray spectroscopy for nanostructured thin film density evaluation. *Sci. Technol. Adv. Mater.* **16**, 025007 (2015).
4. Mistry, H. *et al.* Highly selective plasma-activated copper catalysts for carbon dioxide reduction to ethylene. *Nat. Commun.* **7**, 12123 (2016).
5. Singh, M. R., Clark, E. L. & Bell, A. T. Effects of electrolyte, catalyst, and membrane composition and operating conditions on the performance of solar-driven electrochemical reduction of carbon dioxide. *Phys. Chem. Chem. Phys.* **17**, 18924-18936 (2015).
6. Parratt, L. G. Surface studies of solids by total reflection of X-rays. *Phys. Rev.* **95**, 359 (1954).
7. Martens, G. & Rabe, P. The extended X-ray absorption fine structure in the reflectivity at the K edge of Cu. *J. Phys. C: Solid State Phys.* **14**, 1523 (1981).
8. Kas, R. *et al.* Electrochemical CO<sub>2</sub> reduction on Cu<sub>2</sub>O-derived copper nanoparticles: controlling the catalytic selectivity of hydrocarbons. *Phys. Chem. Chem. Phys.* **16**, 12194-12201 (2014).
